## 10 **Abstract**

### 11 **Background**

12 Seasonal epidemics of bacterial meningitis in the African Meningitis Belt carry a high burden of  
13 disease and mortality. Reactive mass vaccination is used as a control measure during epidemics, but  
14 the time taken to gain immunity from the vaccine reduces the flexibility and effectiveness of these  
15 campaigns. Highly targeted reactive antibiotic prophylaxis could be used to supplement reactive  
16 mass vaccination and further reduce the incidence of meningitis, and the potential effectiveness and  
17 efficiency of these strategies should be explored.

### 18 **Methods and Findings**

19 Data from an outbreak of meningococcal meningitis in Niger, caused primarily by *Neisseria*  
20 *meningitidis* serogroup C, is used to estimate clustering of meningitis cases at the household and  
21 village level. In addition, reactive antibiotic prophylaxis and reactive vaccination strategies are  
22 simulated to estimate their potential effectiveness and efficiency, with a focus on the threshold and  
23 spatial unit used to declare an epidemic and initiate the intervention.

24 There is village-level clustering of meningitis cases after an epidemic has been declared in a health  
25 area. Meningitis risk among household contacts of a meningitis case is no higher than among  
26 members of the same village. Village-wide antibiotic prophylaxis can target secondary cases in  
27 villages: across of range of parameters pertaining to how the intervention is performed, up to 200/  
28 672 cases during the season are potentially preventable. On the other hand, household prophylaxis  
29 targets very few cases. In general, the village-wide strategy is not very sensitive to the method used  
30 to declare an epidemic. Finally, village-wide antibiotic prophylaxis is potentially more efficient than  
31 mass vaccination of all individuals at the beginning of the season, and than the equivalent reactive  
32 vaccination strategy.

### 33 **Conclusions**

34 Village-wide antibiotic prophylaxis should be considered and tested further as a response against  
35 outbreaks of meningococcal meningitis in the Meningitis Belt, as a supplement to reactive mass  
36 vaccination.

## 37 **Author summary**

38 Until a low-cost polyvalent conjugate meningococcal vaccine becomes available in the African  
39 Meningitis Belt, reactive strategies to control meningitis epidemics should be considered and tested,  
40 and refined in order to maximise effectiveness. A recent cluster-randomised trial conducted in Niger  
41 showed promising evidence for the effectiveness of a village-wide reactive antibiotic prophylaxis  
42 intervention. We used data from a meningitis outbreak in Niger to explore the potential  
43 effectiveness and efficiency of this and other strategies when deployed on a wider scale, allowing us  
44 to compare different strategies without recourse to further randomised trials. This study provided  
45 further evidence that village-wide antibiotic prophylaxis targets secondary cases in villages, and  
46 showed that the intervention remains effective whether it is initiated early in the season (targeting  
47 more cases during the season) or later (when clustering of cases by village is strongest). For this  
48 outbreak, reactive village-wide antibiotic prophylaxis would have been more potentially efficient  
49 than mass vaccination at the beginning of the season, implying that targeted prophylaxis could  
50 supplement reactive mass vaccination. Many authors have developed models for vaccination  
51 strategies to reduce the burden of meningitis in sub-Saharan Africa; our results add to this literature  
52 by considering antibiotic prophylaxis as a supplementary intervention.

## 53 **Introduction**

54 Epidemics of bacterial meningitis occur seasonally in the “Meningitis Belt” of sub-Saharan Africa, and  
55 are most commonly due to *Neisseria meningitidis*(1, 2). In Niger and throughout the Meningitis Belt,  
56 spatial clustering of cases(3, 4) can be partly but not fully explained by variations in climatic factors,  
57 suggesting the role of the environment and transmission in driving epidemics(5).

58 Individuals in close contact with meningitis cases are at higher risk for carriage of *N. meningitidis* and  
59 invasive disease, among epidemic and non-epidemic settings(6, 7). Household contacts of  
60 meningococcal meningitis cases are at higher risk of meningococcal meningitis than the general  
61 population, and the risk ratio has been reported to be as high as 1,000(8, 9). In high-resource  
62 settings, the effectiveness of household chemoprophylaxis has been estimated to reduce the risk of  
63 meningitis by 84%(10).

64 Antibiotic prophylaxis of household members of meningococcal meningitis cases is recommended by  
65 the World Health Organisation (WHO) in sub-Saharan Africa outside of an epidemic only(11). This is  
66 because meningitis burden and carriage prevalence are much higher during epidemics(12), so  
67 household chemoprophylaxis would be labor-intensive and could have minimal impact on overall  
68 carriage.

69 The MenAfriVac conjugate vaccine provides long-lasting protection against carriage, leading to vast  
70 reductions in the burden of meningitis due to *N. meningitidis* serogroup A (NmA) since its  
71 introduction. However, polysaccharide vaccines available in the Meningitis Belt against other  
72 serogroups provide only short-lived protection against disease. Until a low-cost conjugate vaccine  
73 targeting these serogroups becomes widely available, reactive mass vaccination campaigns using  
74 polysaccharide vaccines can be conducted during epidemics. However, they are difficult to organize  
75 and implement in a timely fashion, and thus their impact in reducing cases can be limited(13).

76 Targeted prophylactic interventions at a smaller spatial scale could lead to further reduction in cases  
77 during epidemics. A recent cluster-randomized trial in Niger during an outbreak of meningitis caused  
78 by NmC found promising evidence for the effectiveness of village-wide prophylaxis with single-dose  
79 ciprofloxacin at reducing the incidence of meningococcal meningitis at the community level. Overall  
80 incidence was not reduced when prophylaxis was limited to household members of cases(14).

81 Several papers have examined the effect of different intervention thresholds on effectiveness of  
82 interventions for seasonal meningitis outbreaks(15-18). These studies have focused on reactive

83 vaccination, which typically has a lag time of weeks between crossing the epidemic threshold to  
84 implementation. Antibiotic prophylaxis can be performed more quickly than vaccination and without  
85 the need for a cold chain, and antibiotics can be stockpiled more easily and cheaply. In addition, an  
86 individual receiving prophylaxis would receive protection immediately, and although this protection  
87 is unlikely to be as long-lasting, evidence suggests that ciprofloxacin is effective at clearing carriage  
88 up to two weeks after treatment(19).

89 To build on the promising results of the recent trial, it is important to understand the potential for  
90 reactive antibiotic prophylaxis to be used on a wide scale to supplement reactive mass vaccination  
91 and before a polyvalent conjugate vaccine is available. To this end, data from a single epidemic in  
92 the Dosso Region of Niger is used to describe clustering of cases at the household and village level,  
93 and estimate the potential effectiveness of several prophylaxis strategies.

## 94 **Methods**

### 95 **Data Sources**

96 Passive surveillance data from the 2015 meningitis season was collected (Fig 1). This secondary  
97 analysis was classified as exempt by the Harvard T.H. Chan School of Public Health IRB (ref: IRB17-  
98 0974), and all data analysed were anonymised. This season saw a large and unexpected outbreak of  
99 *N. meningitidis* serogroup C in Niger with 8,500 suspected cases reported(20). The peak was  
100 between 4-10 May, and the majority of cases were in Niamey in the southwest, followed by the  
101 Dosso Region, comprising 8 departments. This database was augmented by household follow-up  
102 visits to notified cases in the Dogondoutchi and Tibiri departments in September 2015, by which  
103 cases were linked by household, and household size was collected(21). Population and coordinates  
104 of the villages were sourced from the 2012 census and OpenStreetMap. The study area is made up  
105 of four departments (Dogondoutchi, Tibiri, Gaya, and Dioundiou) each of which is made up of  
106 communes (18 in total). In addition, health areas (*aires de santé*) are defined as the area served by a

107 particular health centre. There are 38 health areas in the study area, with populations ranging from  
 108 8,000 to 56,000.

109 **Fig 1. Epidemic curve in study area.** Weekly attack rate in Dogondoutchi (red), Tibiri (blue),  
 110 Dioundiou (green), Gaya (black), and in the whole study area (purple).

111 The data base contains patient-level information on 752 suspected cases in the Dogondoutchi, Tibiri,  
 112 Gaya and Dioundiou departments between January 2 and May 23. After excluding cases whose  
 113 origin was in Nigeria, 348/429 cases in Dogondoutchi and Tibiri (81%) were reached for the  
 114 household survey. The census data base contained data on 2,588 villages, with 310 villages  
 115 appearing in the case data. The population and coordinates of 246 out of those 310 villages were  
 116 obtained, representing 689 cases (92%). Of these villages, 26 were neighborhoods of the larger cities  
 117 of Dogondoutchi (total population 27,427) and Gaya (total population 44,809). 495 (66%) of cases  
 118 had cerebrospinal fluid samples tested, of which 291 (59%) were confirmed *N. meningitidis*  
 119 (serogroup C, W, or unspecified), 17 (3%) were confirmed *S. pneumoniae*, and 187 (38%) tested  
 120 negative for the presence of these two bacteria.

121 Table 1 shows the variability in commune size, number of suspected cases and whether and when  
 122 the epidemic threshold was crossed.

123 **Table 1. Number of cases and population across study area.**

| Spatial Unit                              | Designation | Population | Number of cases* | Maximum weekly AR (cases/100,000) | Date epidemic threshold is crossed |
|-------------------------------------------|-------------|------------|------------------|-----------------------------------|------------------------------------|
| Dogondoutchi, Tibiri, Gaya, and Dioundiou | Study site  | 987,761    | 689              | 17.7                              | 04/29/2015                         |
| Dogondoutchi                              | Department  | 372,461    | 175              | 10.0                              | -                                  |
| Dan Kassari                               | Commune     | 72,932     | 58               | 19.2                              | 04/27/2015                         |
| Dogondoutchi                              | Commune     | 72,322     | 23               | 9.7                               | -                                  |
| Dogonkiria                                | Commune     | 72,260     | 15               | 8.5                               | -                                  |
| Kieche                                    | Commune     | 48,260     | 54               | 26.9                              | 03/15/2015                         |
| Matankari                                 | Commune     | 68,070     | 19               | 14.7                              | 05/14/2015                         |

|               |            |         |     |       |            |
|---------------|------------|---------|-----|-------|------------|
| Soucoucoutane | Commune    | 38,617  | 7   | 18.1  | 05/04/2015 |
| Tibiri        | Department | 255,693 | 211 | 23.9  | 04/27/2015 |
| Doumega       | Commune    | 25,595  | 17  | 27.3  | 05/03/2015 |
| Guecheme      | Commune    | 111,099 | 67  | 27.9  | 04/27/2015 |
| Kore Mairoua  | Commune    | 60,588  | 62  | 31.4  | 04/24/2015 |
| Tibiri        | Commune    | 58,411  | 65  | 30.8  | 02/25/2015 |
| Gaya          | Department | 260,956 | 44  | 7.3   | -          |
| Bana          | Commune    | 18,128  | 0   | 0     | -          |
| Bengou        | Commune    | 18,232  | 1   | 5.5   | -          |
| Gaya          | Commune    | 62,985  | 10  | 4.8   | -          |
| Tanda         | Commune    | 52,828  | 15  | 18.9  | 05/06/2015 |
| Tounouga      | Commune    | 41,104  | 3   | 4.9   | -          |
| Yelou         | Commune    | 67,679  | 15  | 8.9   | -          |
| Dioundiou     | Department | 98,651  | 258 | 81.1  | 03/20/2015 |
| Dioundiou     | Commune    | 53,604  | 78  | 72.8  | 04/24/2015 |
| Karakara      | Commune    | 32,561  | 147 | 162.5 | 03/17/2015 |
| Zabori        | Commune    | 12,486  | 33  | 120.6 | 04/17/2015 |

124 Description of study area population and number of cases by spatial unit.

125 \* Suspected cases with complete data on village population and latitude/longitude co-ordinates

## 126 Definitions

127 A *N. meningitidis* epidemic is defined by whether the weekly attack rate (cases/100,000) has reached  
 128 a certain threshold(8). The current epidemic threshold used by the WHO is 10 cases/100,000 for any  
 129 population greater than 30,000, or 5 cases in a week for any population under 30,000. We apply  
 130 thresholds of 3, 5, 7, and 10 cases/100,000 to three spatial units: health area, commune, and health  
 131 district, to define whether a region is in an epidemic or not.

132 We are interested in clustering of cases at two spatial units: the household and the village. We  
 133 define a “contact” of a case as a member of the spatial unit of interest, specifically a household  
 134 member or resident of the same village. Specifically, an individual is defined as a “contact” of a case  
 135 if a suspected case has previously occurred in their spatial unit.

## 136 Clustering measures

137 Clustering at the household and village level is described by calculating two metrics:

- 138 • the relative risk of meningococcal meningitis for a contact of a suspected meningococcal
- 139 meningitis case compared to a non-contact (defined as the “household relative risk (RR)” or
- 140 “village relative risk (RR)”);
- 141 • and the proportion of cases that are contacts of a suspected case.

142 The household RR is presented unadjusted and adjusted for the village-level cumulative incidence.

143 Villages with higher attack rates are more likely to have households with multiple cases by chance,

144 and therefore the unadjusted household RR, while useful from a policy standpoint as it identifies

145 high-risk individuals in the population, is biased upwards in describing the relative risk that might be

146 causally due to having a household contact. Similarly, the village RR is adjusted for the commune-

147 level cumulative incidence. The question of whether the pattern of clustering is different outside of

148 an epidemic compared to during an epidemic is addressed by defining such periods and comparing

149 the metrics by outside/during epidemic status.

150 Household RR is estimated using Poisson regression with rate of meningococcal meningitis as the

151 outcome, and household contact as the exposure of interest. We controlled for the cumulative

152 incidence of meningococcal meningitis in the village across the follow-up period by including

153  $\log(\text{cumulative incidence})$  as a variable in the regression model. To compare the household RR in the

154 non-epidemic and epidemic period, we categorized all cases as “epidemic” or “non-epidemic”

155 according to the current WHO epidemic threshold applied at the health area level. We report the

156 household RR in the non-epidemic and epidemic period separately, as well as the relative household

157 RR and confidence interval. Village RR is calculated in a similar way.

158 The proportion of cases that are contacts of a previously-notified case was calculated, and a

159 confidence interval was estimated using log-binomial regression among cases only, with “having a

160 contact” as the outcome. To assess whether the proportion changes between the non-epidemic and

161 epidemic period, we include it as a variable in the model as described above.

## 162 **Reactive prophylaxis intervention**



163 We simulated a variety of prophylaxis strategies on the data, restricted to rural villages only (i.e.  
164 those that were not neighborhoods in the cities of Dogondoutchi or Gaya).

165 We simulate the reactive prophylaxis strategy as follows (see Fig 2). The entire study area starts in  
166 the “pre-epidemic” state, in which surveillance for meningococcal meningitis cases is performed at  
167 the level of the *surveillance unit* (health area, commune, or department). When the attack rate has  
168 reached a given threshold in a surveillance unit, an epidemic is declared in that unit (as in the middle  
169 region in Fig 2). From this day onwards, the unit enters the “epidemic” state, in which villages in the  
170 unit are followed for the incidence of cases. When a triggering case occurs in a village (as in the  
171 second village in Fig 2), the village enters the “contact prophylaxis” state, in which all contacts of the  
172 triggering case are identified and provided prophylaxis. The contacts are defined either as household  
173 members, village members, or all members of villages within a certain radius of the triggering case’s  
174 village.

175 **Fig 2. Schematic of the reactive prophylaxis protocol.** Description of the reactive prophylaxis  
176 protocol, in the pre-epidemic, epidemic, and contact prophylaxis stages.

177 The number of doses needed for each contact prophylaxis is calculated using population data. The  
178 number of potentially prevented cases (PPC) from each round is defined as the number of cases that  
179 occur within a given time window after antibiotic distribution, and the total PPC is the sum of PPCs  
180 from all contact prophylaxis rounds conducted during the intervention. In performing this analysis,  
181 we focus on the direct effect of prophylaxis only, and make no assumptions about indirect effects  
182 caused by clearing of carriage from targeted contacts. The total number treated (TNT) is the total  
183 number of doses administered. The number needed to treat (NNT) per potentially prevented case is  
184 calculated as  $NNT = TNT / PPC$ . Once a village is given a round of prophylaxis, cases that occur in that  
185 village during the presumed time window of effectiveness do not trigger new rounds of prophylaxis,  
186 although cases that occur after the end of the window can trigger further rounds (which is relevant  
187 for the radial strategies, or if villages are repeatedly treated).

188 **Reactive vaccination**

189 Finally, we simulate a reactive vaccination strategy as a comparison for the chemoprophylaxis  
 190 strategies. As well as simulating the above strategies, we calculate the PPC and number needed to  
 191 vaccinate (NNV) for a strategy in which mass vaccination of the entire study area is conducted on the  
 192 day the first case occurs in the season. While this strategy is unrealistic, it represents the best  
 193 possible strategy in terms of PPC and serves as a basis of comparison for the other interventions.

194 Table 2 shows parameters in the model, meanings, and values considered for simulations. We  
 195 consider all suspected cases, excluding only cases that tested positive for *S. pneumoniae*. In effect,  
 196 we assume that all cases that tested negative for *N. meningitidis* are in fact false negatives. We  
 197 perform a sensitivity analysis in which we exclude cases that test negative, and assume that the  
 198 proportion of untested cases that are positive for *N. meningitidis* is equal to the proportion of tested  
 199 cases that are positive. Given the uncertainty around the serial interval for *N. meningitidis* and other  
 200 mechanisms of protection granted by prophylaxis, we assume a range of time windows during which  
 201 prophylaxis can prevent cases. The evidence for the effectiveness of prophylaxis is strongest for  
 202 cases occurring in the two weeks following index case identification(14, 19). We assume that during  
 203 the course of the season, no individual can be treated more than once, although we relax this  
 204 assumption in a sensitivity analysis. In addition, we consider strategies in which only villages below a  
 205 certain population size are targeted. We make no assumptions about the efficacy of prophylaxis,  
 206 reporting only the cases that could be targeted within a given time window.

207 **Table 2. Parameters, meanings, and values considered.**

| Parameter          | Meaning                                                            | Values (default value underlined>)       |
|--------------------|--------------------------------------------------------------------|------------------------------------------|
| Surveillance unit  | Unit at which epidemic surveillance is performed                   | <u>Health area</u> /Commune/Department   |
| Epidemic threshold | Attack rate threshold to define when the epidemic state is entered | 3, 5, 7, and <u>10</u> cases/100,000     |
| Contacts treated   | Group who is treated for each triggering case                      | Household/ <u>Village</u> /Radius 1-20km |

|                   |                                                                                     |                                                                                             |
|-------------------|-------------------------------------------------------------------------------------|---------------------------------------------------------------------------------------------|
| Time window start | Delay between triggering case and start of protection from prophylaxis              | Antibiotics: 1, 2, 3, 4, and 7 days<br>Vaccination: 28 days                                 |
| Time window end   | Number of days following triggering case for which cases are defined as preventable | For time window start 1-4: 7, 14, 21<br>For time window start 7: 14, 21<br>Vaccination: 180 |

208 Model parameter names, description, default and alternative values considered.

## 209 Results

### 210 Clustering

211 Clustering metrics at the village and household level are shown in Table 3. Household metrics were  
 212 calculated using data only from those households that were reached for follow-up visits. The  
 213 household secondary attack rate is nearly four times greater than the attack rate among individuals  
 214 not exposed to a household contact rate. However, there is no elevated meningococcal meningitis  
 215 risk to household members of a meningococcal meningitis case compared to other members of the  
 216 same village. At the village level, members of a village with a meningococcal meningitis case have  
 217 significantly elevated risk of meningococcal meningitis compared with other members of the same  
 218 commune, and over 60% of cases occur in a village that has had a previous case.

219 **Table 3. Household and village clustering metrics.**

220

| Metric                          | Household         | Village              |
|---------------------------------|-------------------|----------------------|
| Relative risk                   | 3.91 (2.27, 6.24) | 3.12 (2.67, 3.64)    |
| Relative risk (adjusted)        | 0.93 (0.53, 1.52) | 2.09 (1.78, 2.46)    |
| % cases that had a past contact | 5.0% (3.0%, 7.8%) | 62.1% (58.4%, 65.7%) |

225 Relative risk, adjusted relative risk, and proportion of secondary cases, estimated at the household  
 226 and village level.

227 The point estimate of household relative risk is lower in the epidemic period than in the non-  
228 epidemic period, but the confidence intervals are wide and the difference is not significant (relative  
229 risk ratio 0.69, 95% CI(0.25, 2.06) ), although there is a lack of power as only 16 secondary cases  
230 were included in the analysis. There is evidence for clustering by village is only during an epidemic:  
231 village RR is 4.80, 95% CI(3.92, 5.93) during an epidemic compared to 1.01, 95% CI(0.76, 1.33) in the  
232 non-epidemic period (see Table S1).

### 233 **Household prophylaxis**

234 The household prophylaxis strategy, under baseline parameter values, would have prevented six  
235 cases, hampered by the fact that only 4% of cases could possibly be targeted by a household-based  
236 intervention. On the other hand, a village-wide prophylaxis strategy would have targeted 178  
237 eventual cases under baseline parameter values. Even though the household strategy prevents a  
238 small number of cases, it is much more efficient than the village strategy, with an NNT of 259.5  
239 compared to 1,020.3 per PPC.

### 240 **The effect of thresholds on village-wide prophylaxis**

241 The combination of threshold for intervention and spatial unit at which the threshold is applied  
242 changes the number of cases targeted and efficiency of the village-prophylaxis strategy by  
243 determining on which day during the season each village receives its round of prophylaxis, and  
244 whether it receives any prophylaxis. Fig 3 shows the TNT, NNT and PPC for various combinations of  
245 threshold and intervention unit.

246 **Fig 3. Potential effectiveness and efficiency of village-prophylaxis strategies by epidemic threshold**  
247 **definition.** Total number treated, potentially prevented cases (PPC) and number needed to treat per  
248 PPC from applying a village-prophylaxis strategy, varying the threshold for intervention, with  
249 surveillance at different spatial units (colors).

250 As the threshold increases the PPC decreases because higher thresholds miss the opportunity to  
251 prevent clustered cases before the threshold is passed or in districts that never reach the threshold,  
252 while the TNT decreases because the intervention starts later in the season and some regions never  
253 pass the higher thresholds. On the other hand, the clustering is stronger later in the season, meaning  
254 that contacts of a case are at higher risk of meningococcal meningitis compared to non-contacts  
255 later in the season compared to earlier in the season. Therefore, NNT also decreases with threshold  
256 (Fig 3).

257 There are small differences between NNT and PPC across the three surveillance units. When  
258 surveillance is performed at the department level, interventions are initiated later in the season  
259 when clustering is strongest, so although NNT is lowest when surveillance is performed at the  
260 department level using a 10 cases/100,000 threshold, this strategy also prevents fewer cases.

### 261 **Radial prophylaxis strategies**

262 Given that spatio-temporal clustering of cases has been shown in previous outbreaks, a prophylaxis  
263 strategy targeting multiple villages might be expected to potentially prevent more cases. However, if  
264 each village can only be targeted once in the season, a large radius might get “ahead” of the  
265 clustering and target villages too early to prevent cases. Whether this happens is determined by a  
266 combination of the spatial unit at which the threshold is monitored (health area, commune, or  
267 department), the radius of intervention, and the number of days prophylaxis can be expected to  
268 protect cases.

269 This logic is borne out in Fig 4, in which TNT, NNT and PPC are shown by radius of the treatment unit,  
270 for thresholds of 5, 7, and 10 cases/100,000 applied at the health area level. A radius of 10km  
271 around the triggering case increases the PPC relative to the village approach. A higher radius targets  
272 villages that experience cases after the prophylaxis window, and the PPC decreases as the radius  
273 increases from 10 to 20km. In general, increasing radius leads to increasing TNT, as more villages  
274 with no cases are targeted. NNT also increases with radius, as the population-level attack rate is low

275 and only 310 out of 2,588 villages (12%) experience any cases. The above pattern is similar when the  
276 threshold is monitored at the commune and department level.

277 **Fig 4. Potential effectiveness and efficiency of prophylaxis strategies by radius of prophylaxis.** Total  
278 number treated, potentially prevented cases (PPC) and number needed to treat per PPC by radius of  
279 prophylaxis, varying the health area-level threshold for intervention start (line type).

#### 280 **Comparison of reactive vaccination and reactive village prophylaxis**

281 The most effective possible strategy, mass vaccination of the study population upon notification of  
282 the first case in the season, would have targeted 645 PPC, with NNV of 1531.4 vaccines per PPC.  
283 Other more targeted reactive vaccination strategies would have been much less effective at  
284 targeting cases due to the lag between case notification and implementation of the vaccination  
285 strategy (Fig 5), and the speed of an epidemic within a single village.

286 **Fig 5. Potentially effectiveness and efficiency of village-antibiotic and village-vaccination**  
287 **prophylaxis strategies.** Potentially prevented cases (PPC) and number needed to treat/vaccinate per  
288 PPC from applying a village-prophylaxis antibiotic (blue) and vaccination (green) strategy, varying the  
289 threshold for intervention at the health area level.

290 Under baseline parameter values, a village-wide reactive antibiotic prophylaxis strategy targets  
291 between 177 and 202 PPC, with NNT ranging from 1012.3 and 1318.6 doses per PPC depending on  
292 when the intervention is initiated. The same strategy implemented with vaccines rather than  
293 antibiotics would target fewer than 80 PPC, with NNV exceeding 3,000 vaccines per PPC.

#### 294 **Effect of reactive antibiotic prophylaxis across a range of parameters**

295 Other parameters relating to how the strategies are implemented affect the success of the  
296 intervention (Table 4). Excluding cases that tested negative for the presence of *N. meningitidis*  
297 reduces PPC and increases NNT, but the trends in Figs 3 and 4 are unaffected, and the antibiotic

298 prophylaxis strategy remains more efficient than the reactive vaccination strategy. See S1 File for  
 299 TNT, NNT, and PPC across the full range of parameters explored.

300 **Table 4. Potential effectiveness and efficiency of village-prophylaxis strategies across a range of**  
 301 **parameters.**

| Parameter                        | Value | TNT     | PPC   | NNT  |
|----------------------------------|-------|---------|-------|------|
| Baseline set                     | -     | 181,612 | 178   | 1020 |
| Time window start                | 1     | 181,612 | 198   | 917  |
|                                  | 7     | 181,612 | 64    | 2838 |
| Time window end                  | 7     | 181,612 | 128   | 1419 |
|                                  | 21    | 181,612 | 211   | 861  |
| Age range                        | 5-29  | 98,070  | 134   | 732  |
| Maximum village population       | 1,000 | 55,648  | 62    | 898  |
|                                  | 5,000 | 163,093 | 159   | 1026 |
| Repeated doses                   | Yes   | 287,491 | 221   | 1301 |
| Excluding cases testing negative | Yes   | 181,612 | 102.6 | 1770 |

302 Total number treated, potentially prevented cases, and number needed to treat under a range of  
 303 parameters.

## 304 Discussion

305 In this outbreak in a largely rural region of Niger, there is measurable clustering of cases at the  
 306 village level only after the epidemic threshold was reached, and a village-wide prophylaxis approach  
 307 implemented during the epidemic targets secondary cases within villages, with a maximum of 200  
 308 out of 672 suspected cases targeted for across different parameters pertaining to implementation of  
 309 the strategy.

310 Household prophylaxis is currently recommended in the African Meningitis Belt only outside of an  
 311 epidemic. Data from this outbreak provide evidence that household prophylaxis during an epidemic  
 312 can be an efficient way to target secondary cases within the household, but that such a strategy  
 313 would have had minimal impact on the overall burden of disease during the outbreak. We found  
 314 that clustering of cases at the household level was explained by households being in higher-burden

315 villages, as has been observed for other infectious diseases(22). There was no evidence that  
316 household clustering was any stronger before the epidemic threshold was reached, suggesting that  
317 the strategy would target a similar number of people during an epidemic.

318 Previous research has focused on the effect of different epidemic thresholds on the effectiveness of  
319 reactive mass vaccination. We found that the success of the village-prophylaxis strategy is not  
320 strongly dependent on the value of the threshold used, because the threshold is used to initiate a  
321 reactive intervention. Performing surveillance at larger spatial units does not markedly improve the  
322 success of the village-wide strategy, suggesting that much of the benefit of the village-prophylaxis  
323 strategy is gained from the targeting of the villages themselves. Although including multiple villages  
324 in a round of prophylaxis can increase the number of cases targeted, the dosing of villages that  
325 would have experienced no cases leads to a general increase in NNT for these radial strategies. This  
326 seems to contrast with the finding of Maïnassara et al(17) for reactive vaccination, that health area  
327 surveillance combined with district-level vaccination was the most effective strategy; however, the  
328 difference is traceable to the difference between vaccination and antibiotic prophylaxis. Because  
329 vaccination protects individuals until the end of the season, a reactive vaccination strategy cannot  
330 get ahead of the spatial clustering in the same way.

331 A potential advantage of reactive prophylaxis over reactive mass vaccination is the ability to perform  
332 such a strategy within days rather than weeks of the alert threshold being reached. Similarly, the  
333 biological effect of antibiotic prophylaxis is immediate, while there is a lag between receiving a  
334 vaccination and gaining immunity. In this outbreak, prophylaxis strategies generally perform better  
335 than the equivalent reactive vaccination strategies in terms of effectiveness and efficiency because  
336 they can be triggered later and thus target more high-risk areas. The best vaccination strategy is one  
337 that targets all individuals at the beginning of the season, but such a strategy would be inefficient in  
338 a season without a large epidemic.



339 This study is one of a number that have assessed the clustering of meningitis cases by household in  
340 Meningitis Belt countries. Three case-control studies conducted following outbreaks reported  
341 positive or null associations between meningococcal meningitis and a household contact(23-25). In  
342 addition, several cross-sectional carriage surveys have been performed that reported the association  
343 between carriage of *N. meningitidis* and household contact of a meningococcal meningitis case(26-  
344 29). These studies generally report a positive association, although only two reached statistical  
345 significance. Finally, a longitudinal carriage study carried out during the MenAfriVac campaign found  
346 a 4.5-fold increase in acquisition rate of carriage for household contacts of a case compared to non-  
347 contacts(7).

348 Our finding that 4% of cases in this outbreak were secondary within a household reflects an upper  
349 bound on the proportion of infections that are household-acquired, and is similar to recent  
350 estimates for meningococcal meningitis in Western countries(30). Increased meningococcal  
351 meningitis risk to household contacts and the low proportion of meningococcal meningitis cases that  
352 are household-acquired are not inconsistent findings. Households are small and the overall  
353 population incidence rate is low, so even if the household risk ratio is high, household members'  
354 absolute risk of meningococcal meningitis is small, and few individuals are exposed to a primary case  
355 in a household. It is thus important to understand that targeting the household is unlikely to have an  
356 impact on disease burden at the population level, even though this might be a high-risk group, when  
357 carriage prevalence and community transmission are high. In general, the effectiveness of household  
358 interventions is bounded by the proportion of infections acquired in the household, but is  
359 additionally determined by the timing of the intervention and the serial interval. A household  
360 transmission study for *N. meningitidis* carriage during an outbreak, while very challenging, would  
361 provide valuable insight into such parameters.

362 In analyzing this outbreak, we focused on potentially preventable cases in the absence of a  
363 comparator in which an intervention was performed, so our results have limited external

364 comparability with other studies of meningitis outbreaks – specifically, we did not consider  
365 incomplete coverage or imperfect efficacy of prophylaxis. In addition, the effect of ciprofloxacin  
366 distribution on transmission dynamics of *N. meningitidis* is not considered, meaning that our  
367 estimates may miss some important indirect effects of administering prophylaxis on a large scale.  
368 We made a simplifying assumption that prophylaxis prevents any cases that would have occurred  
369 during a given time window, but this parameter is unknown. The focus on a single season in which  
370 an outbreak did occur limits the generalizability of our results because we did not have access to a  
371 “control” season in which there was low burden of meningococcal meningitis. Therefore,  
372 conclusions about the benefits of lower thresholds should be considered in this context.

373 The data on which this analysis was based consists of suspected cases reporting to health centres  
374 and hospitals in the region. As such, cases that did not present to a health centre but were still  
375 preventable are not counted in the analysis. The method for linking case data to census data was not  
376 perfect due to missing villages in the census data and villages with different names. As a result, 63  
377 cases were excluded from the analysis due to missing or ambiguous village location and population  
378 data. Although these two effects lead to underestimation of the effect of village-wide prophylaxis,  
379 the trends observed are likely to be robust to missingness unless there is systematic bias in the  
380 presence of missingness, for example by time of year.

381 The recent trial of antibiotic prophylaxis in response to a meningitis epidemic showed promising  
382 results. Analysis of historical data shows that there is little household clustering of meningitis cases,  
383 and that household prophylaxis would have had limited effect on the course of the epidemic, similar  
384 to results seen in the trial. On the other hand, there is clustering of meningitis cases at the village  
385 level during an epidemic, and a reactive village-prophylaxis strategy conducted in epidemic districts  
386 can target secondary cases in villages. Our results also suggest that village-wide prophylaxis is more  
387 efficient than highly targeted reactive vaccination. However, the longer-term effectiveness of

388 prophylaxis strategies on their own may be limited, and should thus be considered alongside  
389 reactive vaccination.

## 390 **Acknowledgments**

391 The authors would like to thank Aimee Taylor for designing the protocol schematic in Figure 2.

## 392 **References**

- 393 1. Lapeyssonie L, WHO. La méningite cérébrospinale en Afrique. Bulletin of the WHO. 1963;28.
- 394 2. Greenwood B. Meningococcal meningitis in Africa. Trans R Soc Trop Med Hyg. 1999;93:341-  
395 53.
- 396 3. Paireau J, Girond F, Collard JM, Mainassara HB, Jusot JF. Analysing spatio-temporal clustering  
397 of meningococcal meningitis outbreaks in Niger reveals opportunities for improved disease control.  
398 PLoS Negl Trop Dis. 2012;6(3):e1577.
- 399 4. Mainassara HB, Molinari N, Demattei C, Fabbro-Peray P. The relative risk of spatial cluster  
400 occurrence and spatio-temporal evolution of meningococcal disease in Niger, 2002-2008. Geospatial  
401 Health. 2010;5(1):93-101.
- 402 5. Paireau J, Mainassara HB, Jusot JF, Collard JM, Idi I, Moulia-Pelat JP, et al. Spatio-temporal  
403 factors associated with meningococcal meningitis annual incidence at the health centre level in  
404 Niger, 2004-2010. PLoS Negl Trop Dis. 2014;8(5):e2899.
- 405 6. Agier L, Martiny N, Thiongane O, Mueller JE, Paireau J, Watkins ER, et al. Towards  
406 understanding the epidemiology of Neisseria meningitidis in the African meningitis belt: a multi-  
407 disciplinary overview. Int J Infect Dis. 2017;54:103-12.
- 408 7. MenAfriCar Consortium. Household transmission of Neisseria meningitidis in the African  
409 meningitis belt: a longitudinal cohort study. The Lancet Global Health. 2016;4(12):e989-e95.
- 410 8. WHO. Meningitis outbreak response in sub-Saharan Africa. 2014.
- 411 9. Stephens DS, Greenwood B, Brandtzaeg P. Epidemic meningitis, meningococcaemia, and  
412 Neisseria meningitidis. The Lancet. 2007;369(9580):2196-210.
- 413 10. Telisinghe L, Waite TD, Gobin M, Ronveaux O, Fernandez K, Stuart JM, et al.  
414 Chemoprophylaxis and vaccination in preventing subsequent cases of meningococcal disease in  
415 household contacts of a case of meningococcal disease: a systematic review. Epidemiol Infect.  
416 2015;143(11):2259-68.
- 417 11. WHO. Weekly epidemiological record. 2017.
- 418 12. Mueller JE, Gessner BD. A hypothetical explanatory model for meningococcal meningitis in  
419 the African meningitis belt. Int J Infect Dis. 2010;14(7):e553-9.
- 420 13. Ferrari MJ, Fermon F, Nackers F, Llosa A, Magone C, Grais RF. Time is (still) of the essence:  
421 quantifying the impact of emergency meningitis vaccination response in Katsina State, Nigeria. Int  
422 Health. 2014;6(4):282-90.
- 423 14. Coldiron ME, Assao B, Page AL, Hitchings MDT, Alcoba G, Ciglencecki I, et al. Single-dose oral  
424 ciprofloxacin prophylaxis as a response to a meningococcal meningitis epidemic in the African  
425 meningitis belt: A 3-arm, open-label, cluster-randomized trial. PLoS Med. 2018;15(6):e1002593.
- 426 15. Cooper LV, Stuart JM, Okot C, Asiedu-Bekoe F, Afreh OK, Fernandez K, et al. Reactive  
427 vaccination as a control strategy for pneumococcal meningitis outbreaks in the African meningitis  
428 belt: Analysis of outbreak data from Ghana. Vaccine. 2018.

- 429 16. Kaninda A-V, Belanger F, Lewis R, Batchassi E, Aplogan A, Yakoua Y, et al. Effectiveness of  
430 incidence thresholds for detection and control of meningococcal meningitis epidemics in northern  
431 Togo. *Int J Epidemiol.* 2000;29:933-40.
- 432 17. Maïnassara HB, Paireau J, Idi I, Pelat JP, Oukem-Boyer OO, Fontanet A, et al. Response  
433 Strategies against Meningitis Epidemics after Elimination of Serogroup A Meningococci, Niger. *Emerg*  
434 *Infect Dis.* 2015;21(8):1322-9.
- 435 18. Trotter CL, Cibrelus L, Fernandez K, Lingani C, Ronveaux O, Stuart JM. Response thresholds  
436 for epidemic meningitis in sub-Saharan Africa following the introduction of MenAfriVac(R). *Vaccine.*  
437 2015;33(46):6212-7.
- 438 19. Zalmanovici Trestioreanu A, Fraser A, Gafter-Gvili A, Paul M, Leibovici L. Antibiotics for  
439 preventing meningococcal infections. *Cochrane Database Syst Rev.* 2013(10):CD004785.
- 440 20. Sidikou F, Zaneidou M, Alkassoum I, Schwartz S, Issaka B, Obama R, et al. Emergence of  
441 epidemic *Neisseria meningitidis* serogroup C in Niger, 2015: an analysis of national surveillance data.  
442 *The Lancet Infectious Diseases.* 2016;16(11):1288-94.
- 443 21. Coldiron ME, Salou H, Sidikou F, Goumbi K, Djibo A, Lechevalier P, et al. Case-Fatality Rates  
444 and Sequelae Resulting from *Neisseria meningitidis* Serogroup C Epidemic, Niger, 2015. *Emerg Infect*  
445 *Dis.* 2016;22(10):1827-9.
- 446 22. Katz J, Zeger SL, Tielsch J. Village and household clustering of xerophthalmia and trachoma.  
447 *Int J Epidemiol.* 1988;17(4):865-9.
- 448 23. Mutonga DM, Pimentel G, Muindi J, Nzioka C, Mutiso J, Klena JD, et al. Epidemiology and  
449 Risk Factors for Serogroup X Meningococcal Meningitis during an Outbreak in Western Kenya, 2005–  
450 2006. *Am J Trop Med Hyg.* 2009;80(4):619-24.
- 451 24. Hodgson A, Smith T, Gagneux S, Adjuik M, Pluschke G, Kumasenu Mensah N, et al. Risk  
452 factors for meningococcal meningitis in northern Ghana. *Trans R Soc Trop Med Hyg.* 2001;95:477-80.
- 453 25. Hossain MJ, Roca A, Mackenzie GA, Jasseh M, Hossain MI, Muhammad S, et al. Serogroup  
454 W135 meningococcal disease, The Gambia, 2012. *Emerg Infect Dis.* 2013;19(9):1507-10.
- 455 26. Raghunathan PL, Jones JD, Tiendrebéogo SR, Sanou I, Sangaré L, Kouanda S, et al. Predictors  
456 of Immunity after a Major Serogroup W-135 Meningococcal Disease Epidemic, Burkina Faso, 2002. *J*  
457 *Inf Dis.* 2006;193:607-16.
- 458 27. Mueller JE, Yaro S, Madec Y, Somda PK, Idohou RS, Lafourcade BM, et al. Association of  
459 respiratory tract infection symptoms and air humidity with meningococcal carriage in Burkina Faso.  
460 *Trop Med Int Health.* 2008;13(12):1543-52.
- 461 28. Hassan-King M, Greenwood BM, Whittle HC, Abbott JD, Sutcliffe EM. An epidemic of  
462 meningococcal infection at Zaria, Northern Nigeria. 3. Meningococcal carriage. *Trans R Soc Trop Med*  
463 *Hyg.* 1979;73(5):567-73.
- 464 29. Emele FE, Ahanotu CN, Anyiwo CE. Nasopharyngeal carriage of meningococcus and  
465 meningococcal meningitis in Sokoto, Nigeria. *Acta Pædiatr.* 1999;88:265-9.
- 466 30. Hoebe C, de Melker H, Spanjard L, Dankert J, Nagelkerke N. Space-Time Cluster Analysis  
467 of Invasive Meningococcal Disease. *Emerg Infect Dis.* 2004;10(9):1621-6.

## 468 **Supporting Information**

469 **S1 Table. Clustering metrics at the household and village level, in the non-epidemic and epidemic**  
470 **periods.** Household and village relative risk and proportion of secondary cases, estimated in the non-  
471 epidemic and epidemic periods.

472 **S1 File. Supplementary results.** TNT, PPC, and NNT/NNV of reactive prophylaxis and vaccination

473 strategies across a range of parameters.

474

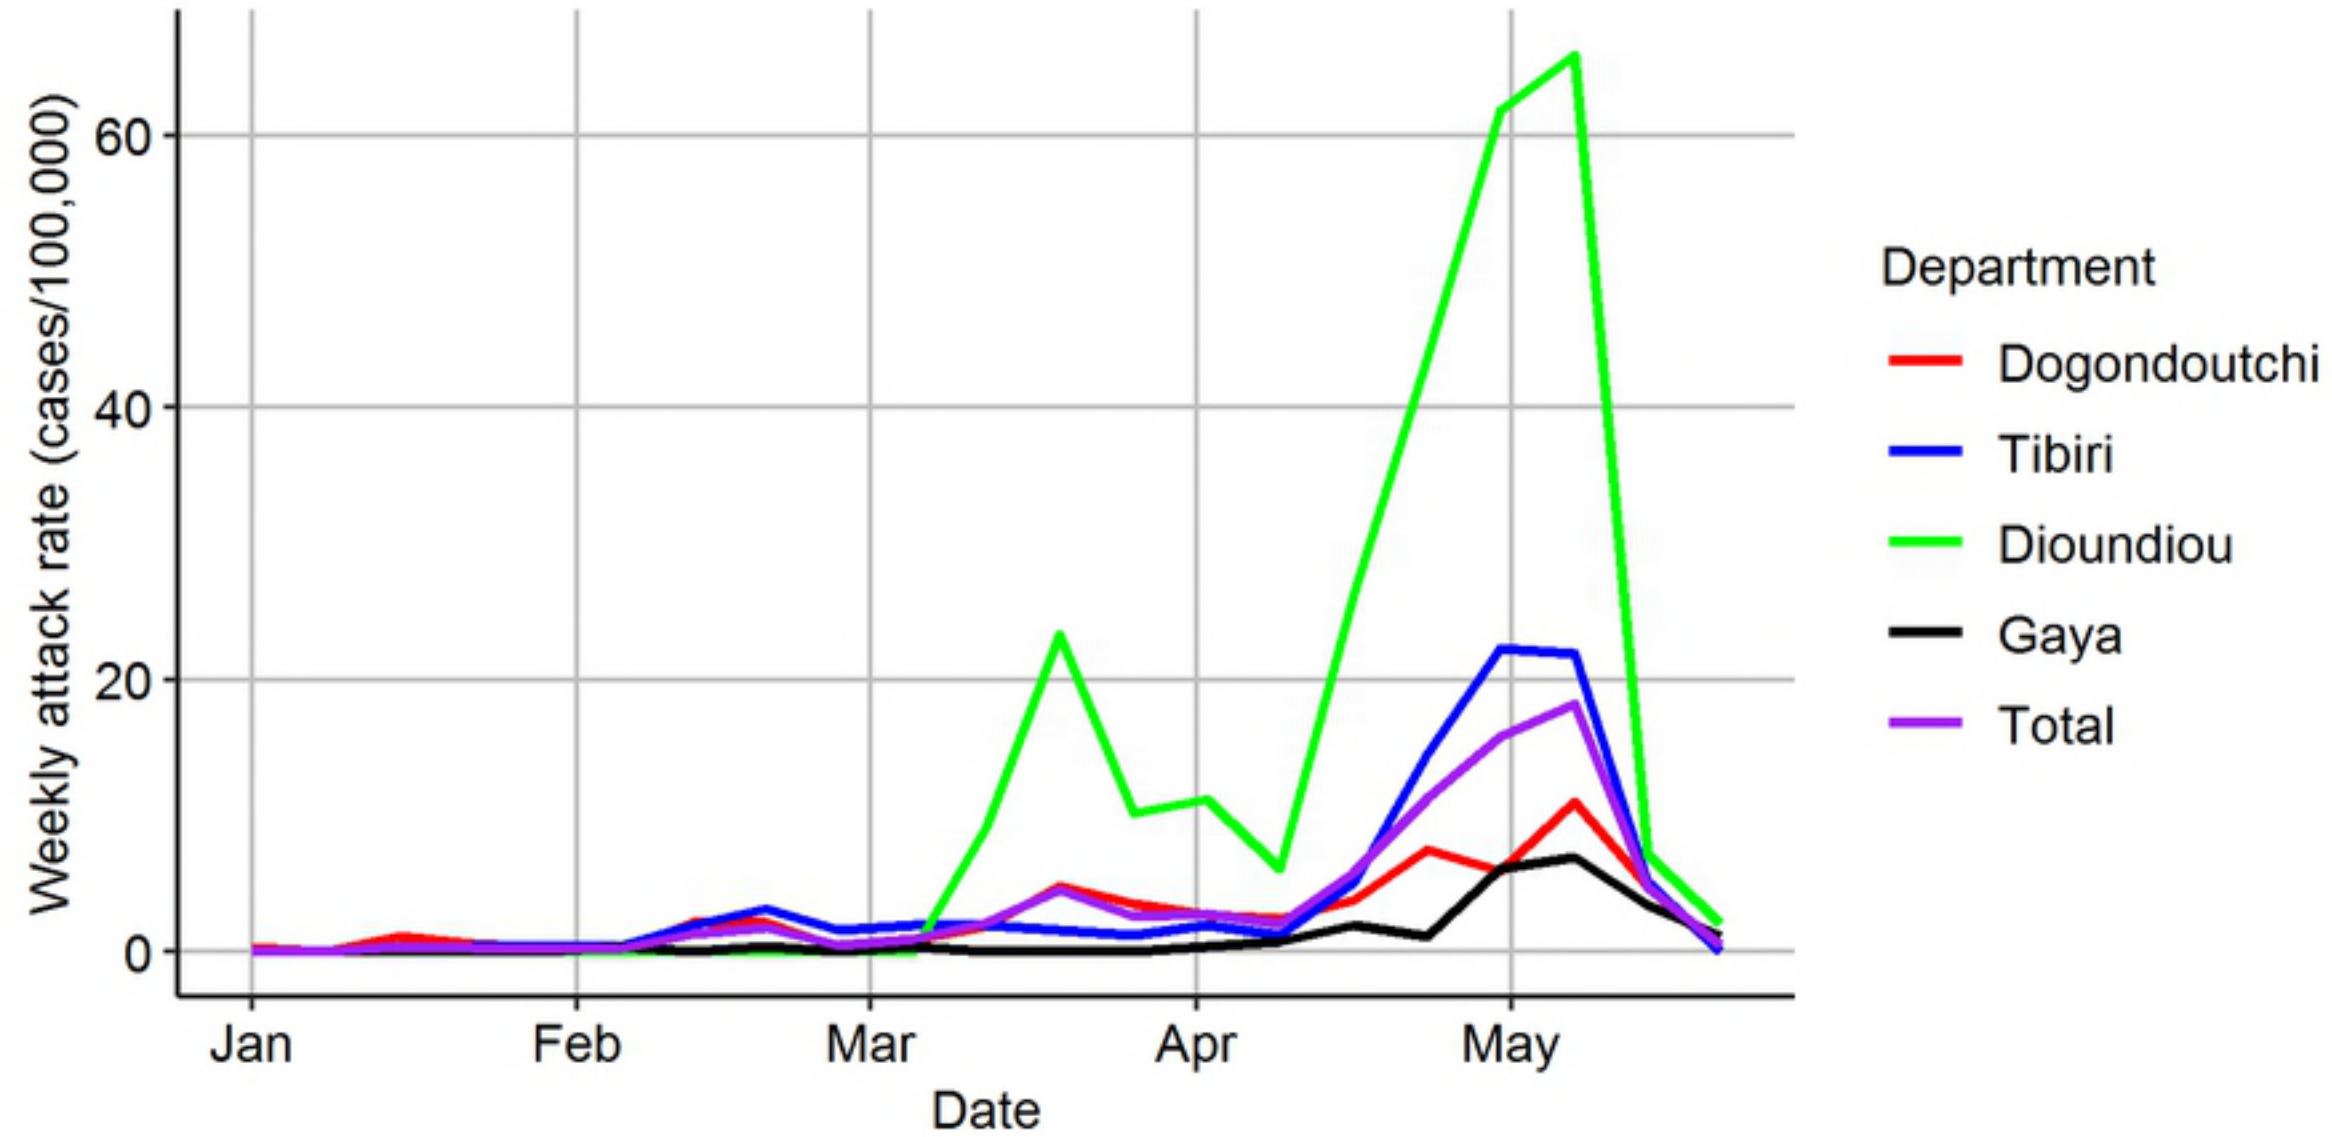

Figure

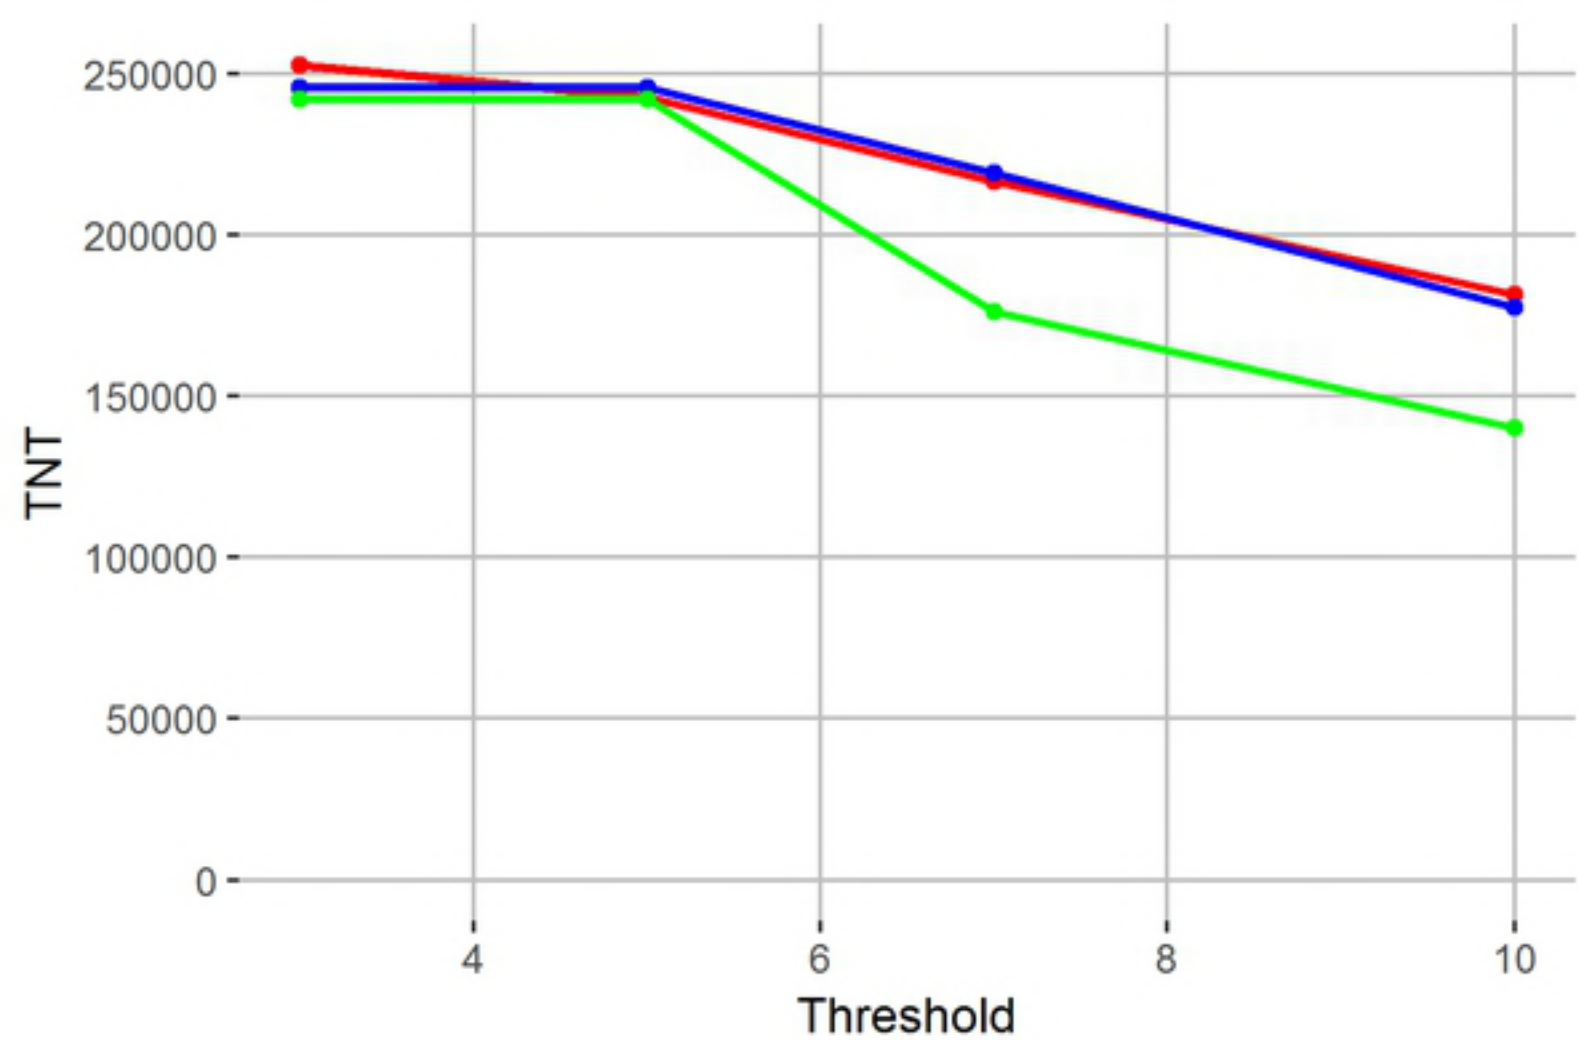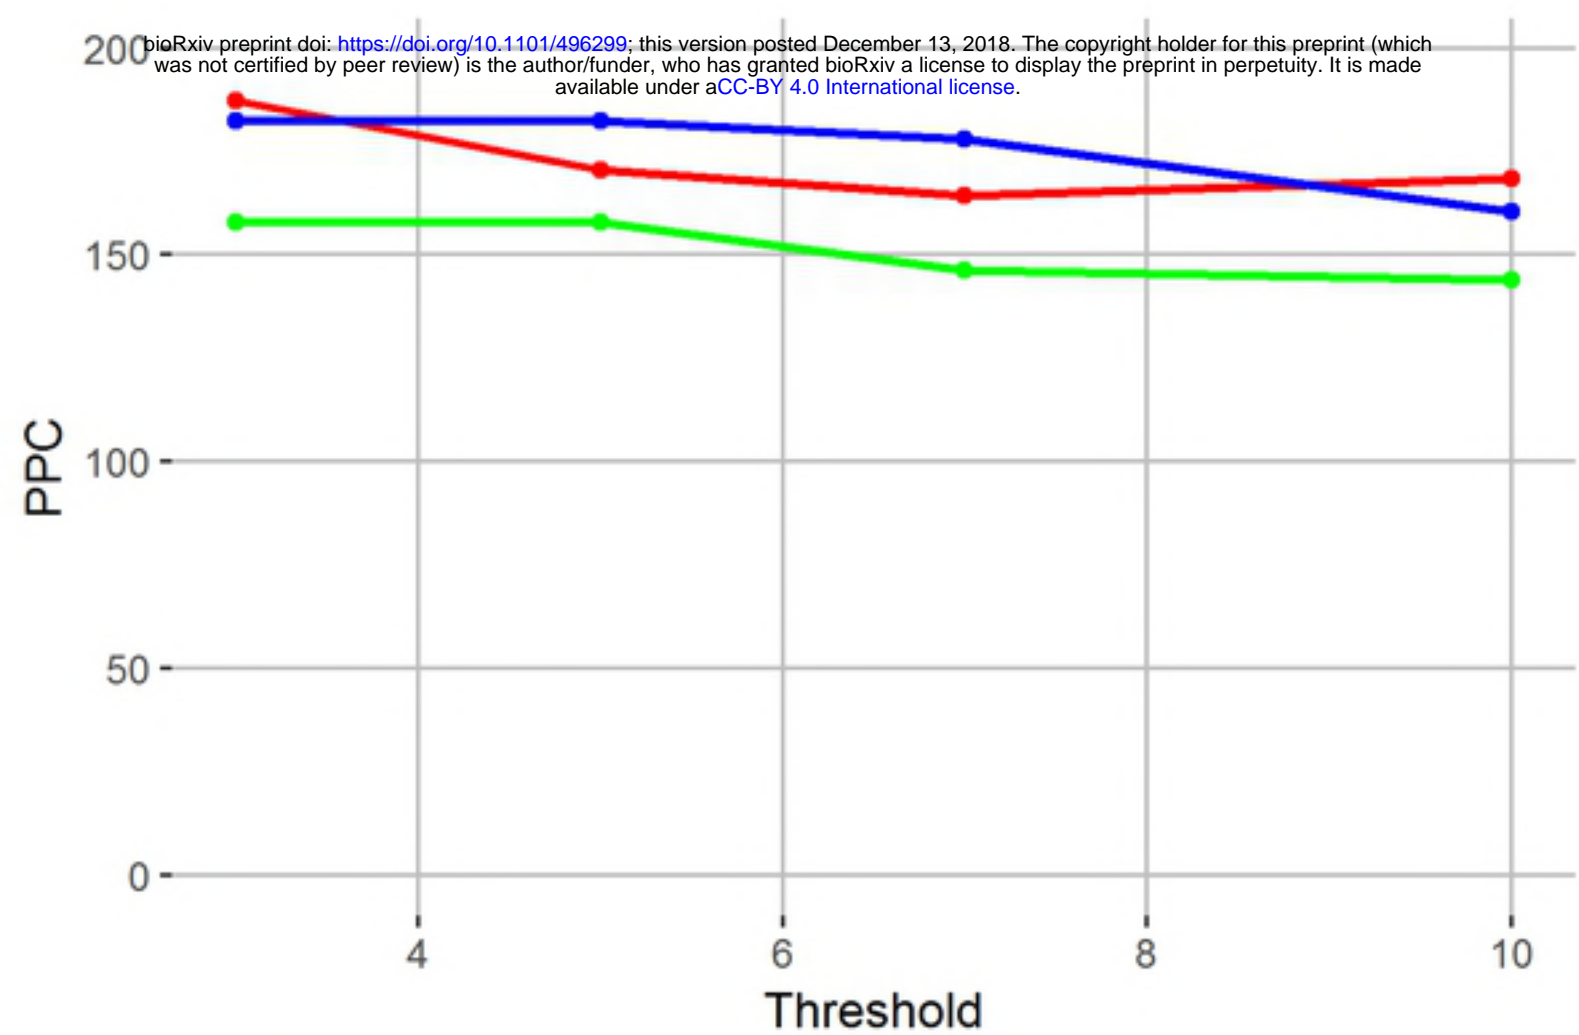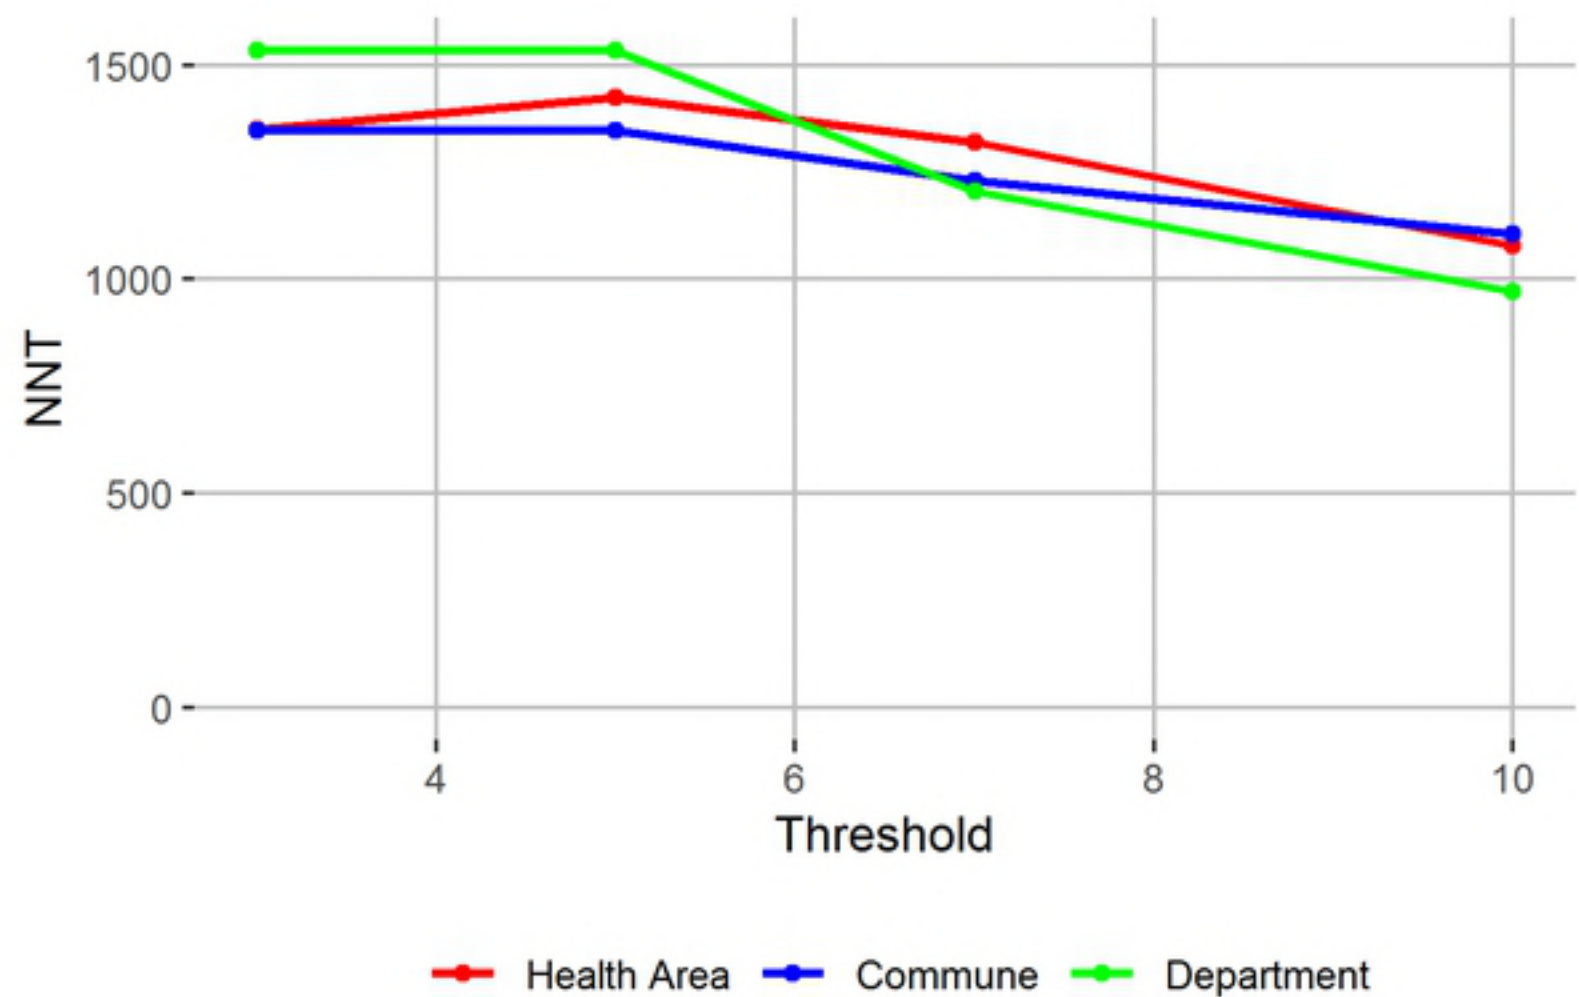

Figure

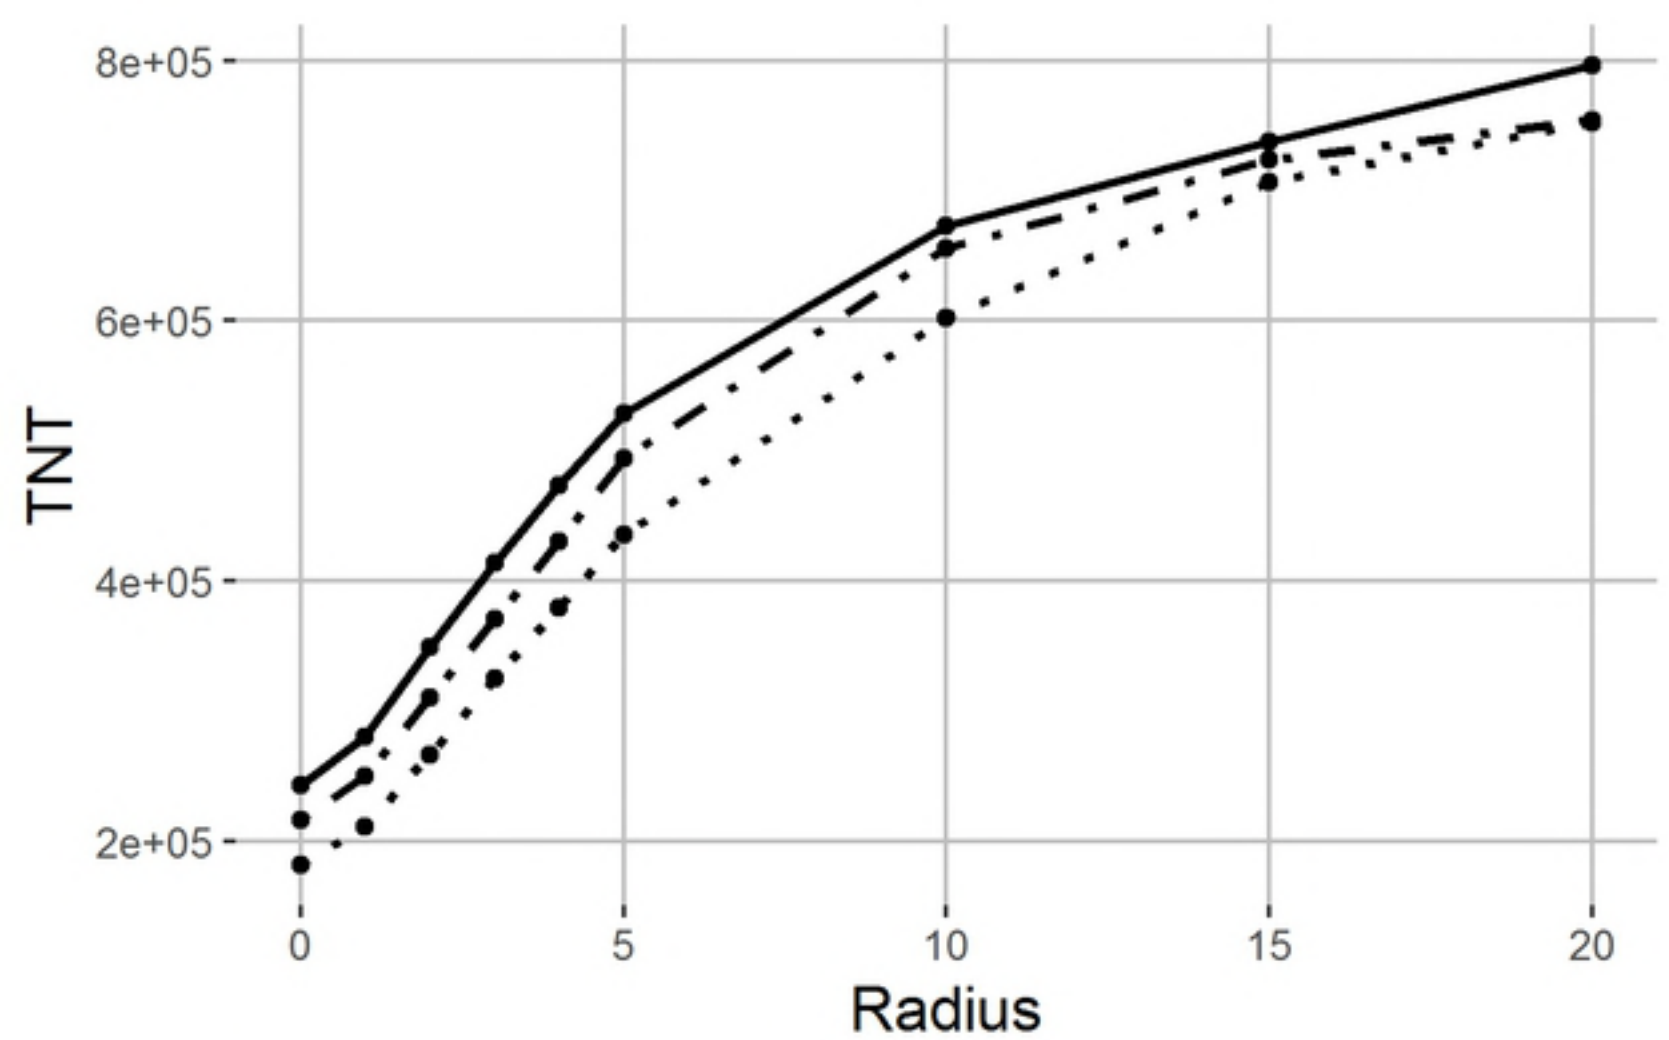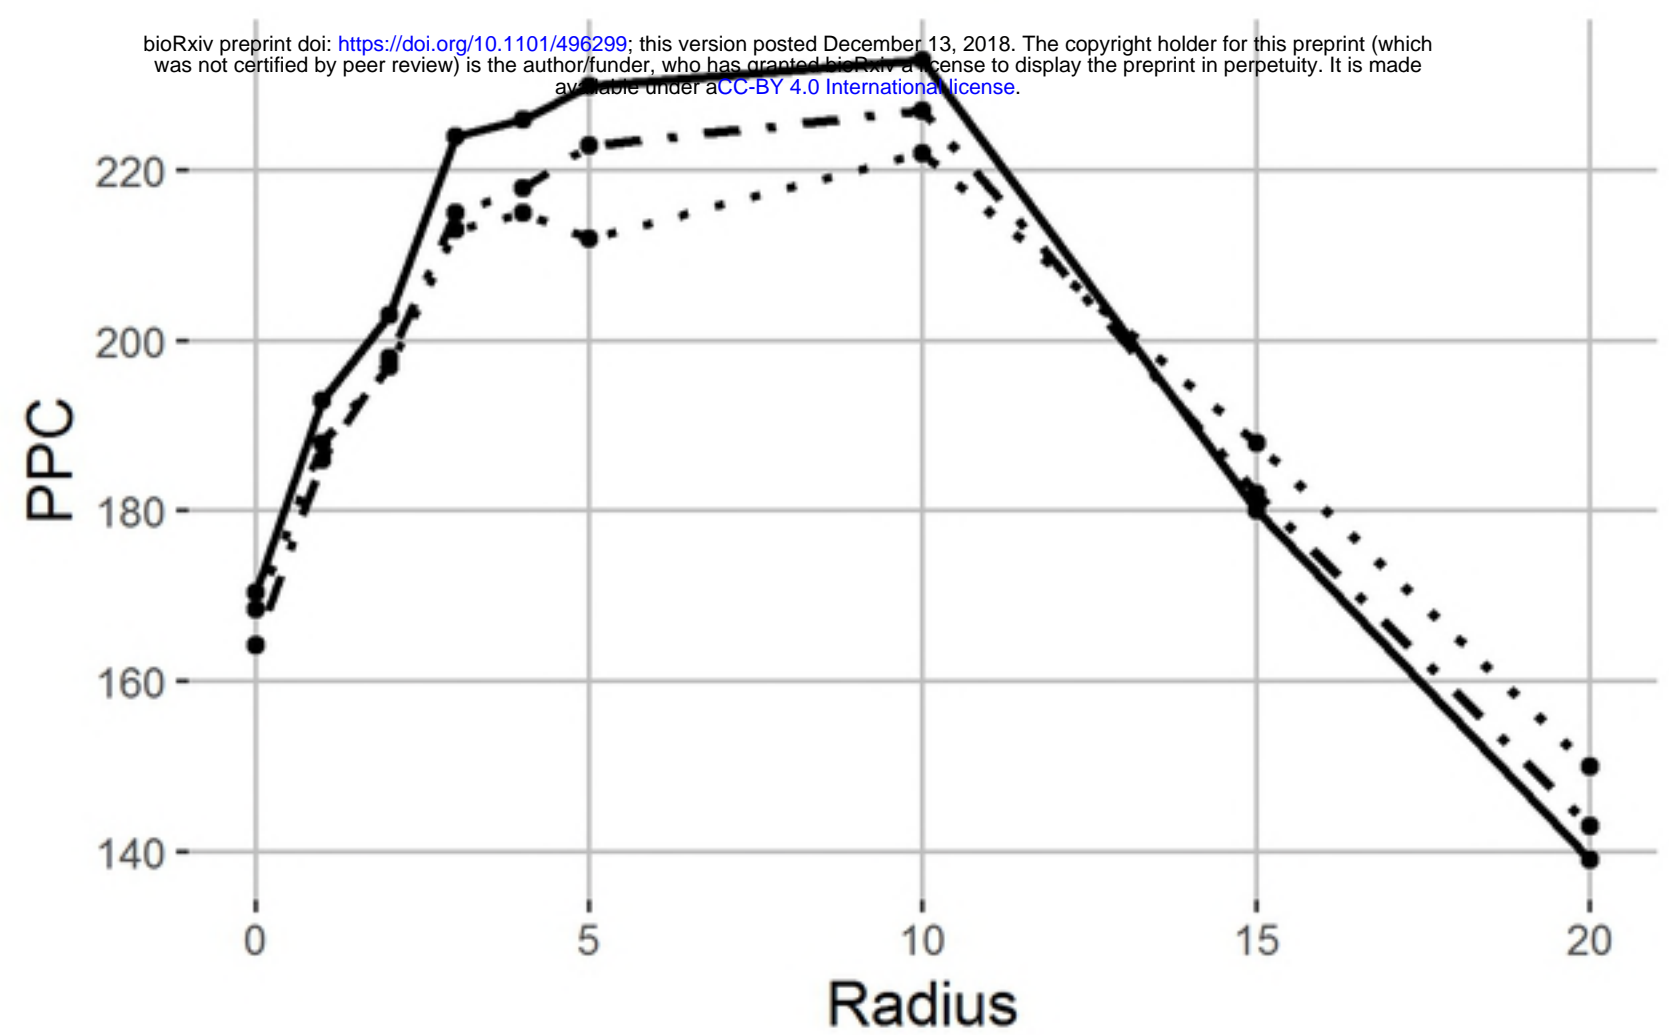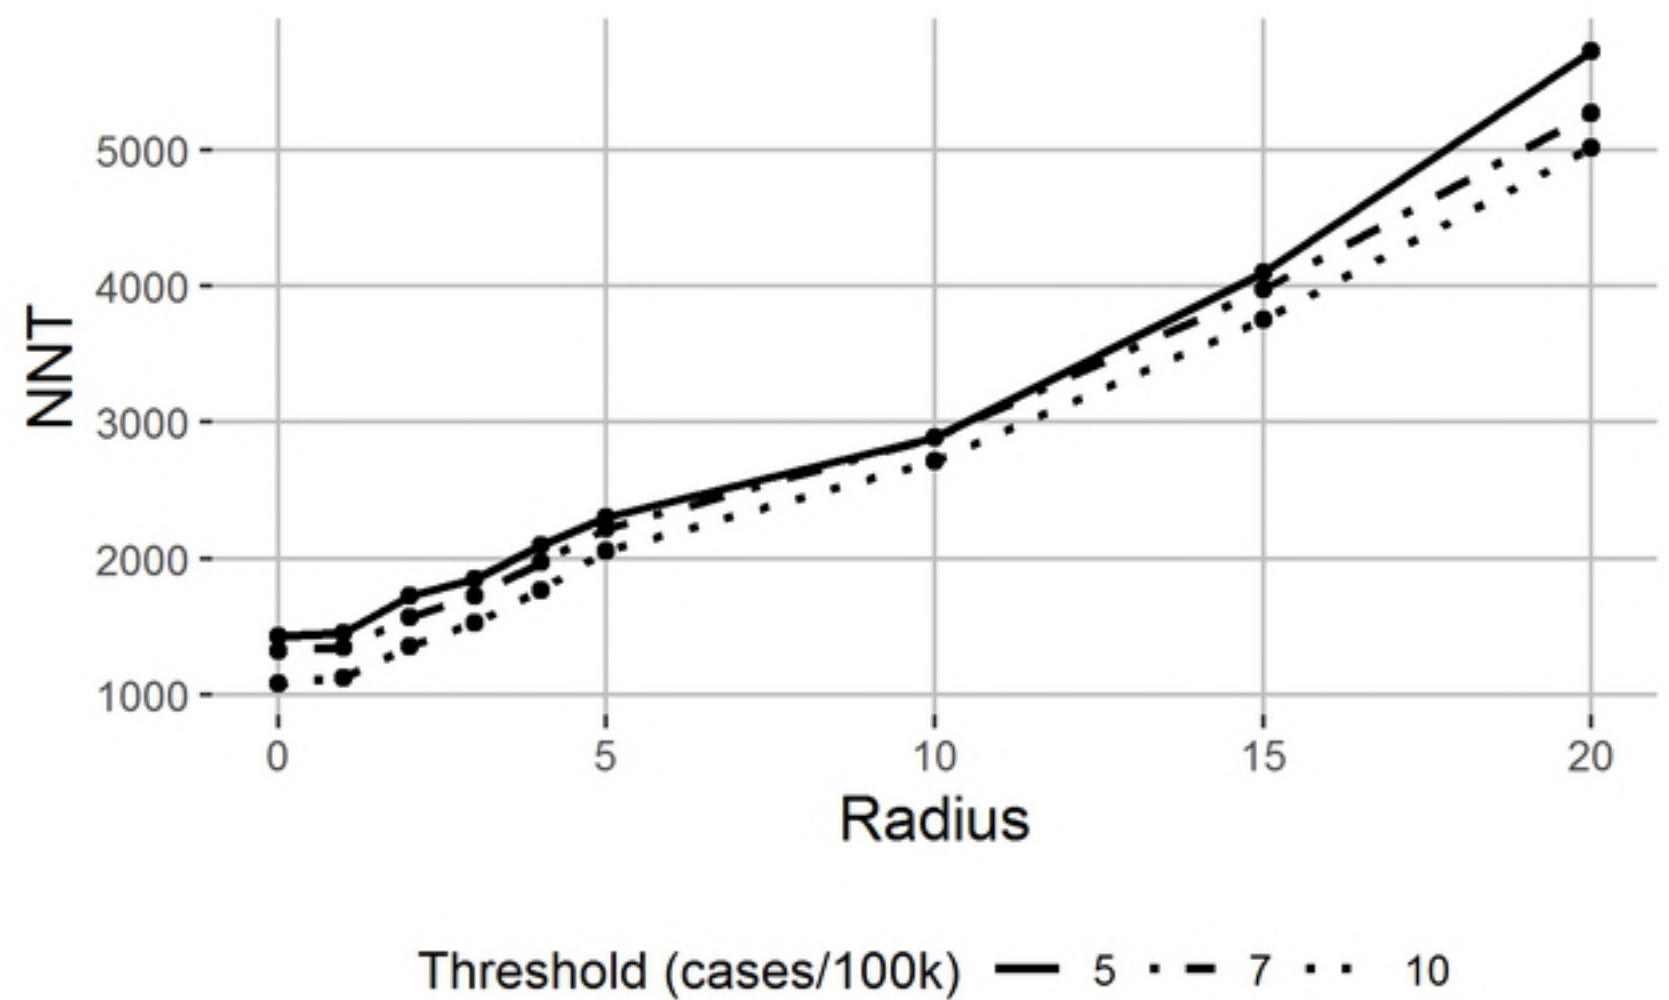

Figure



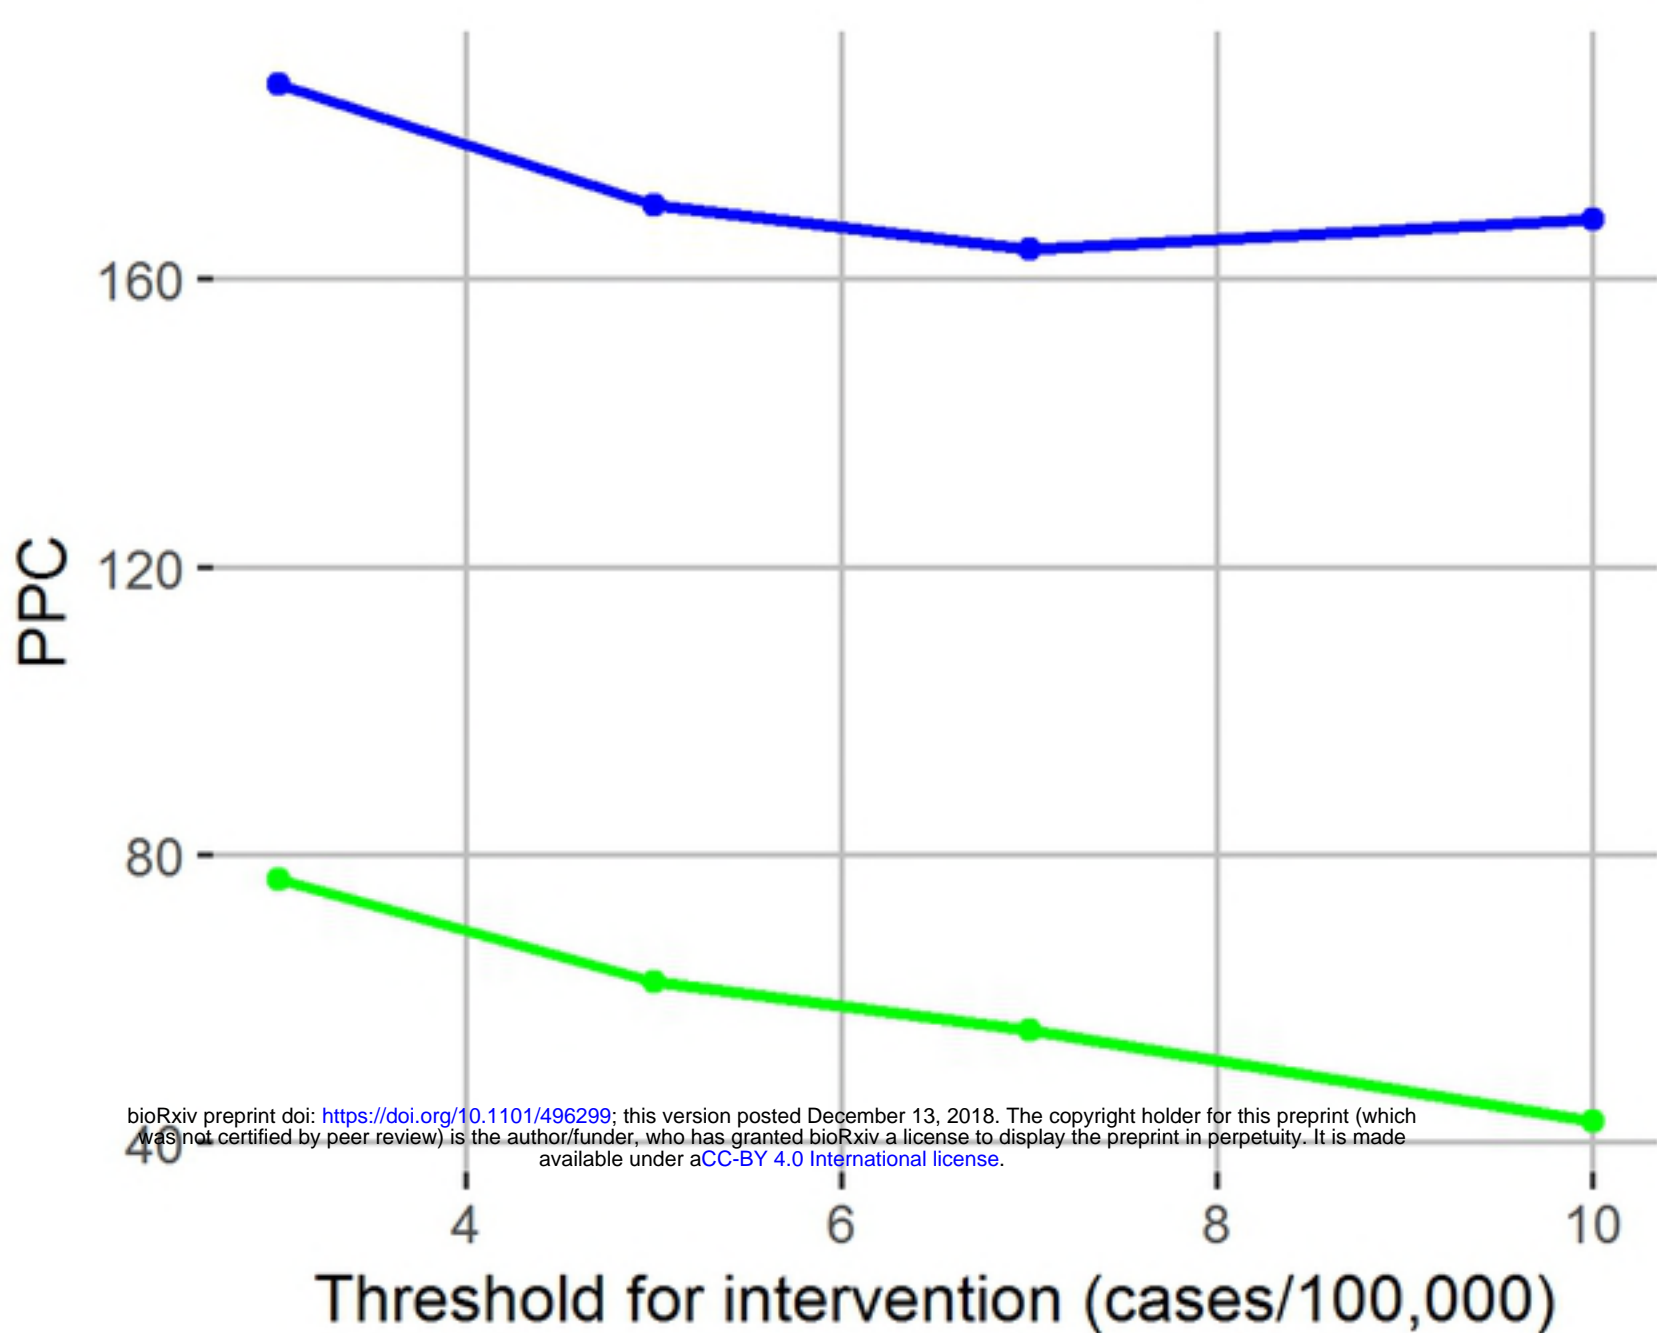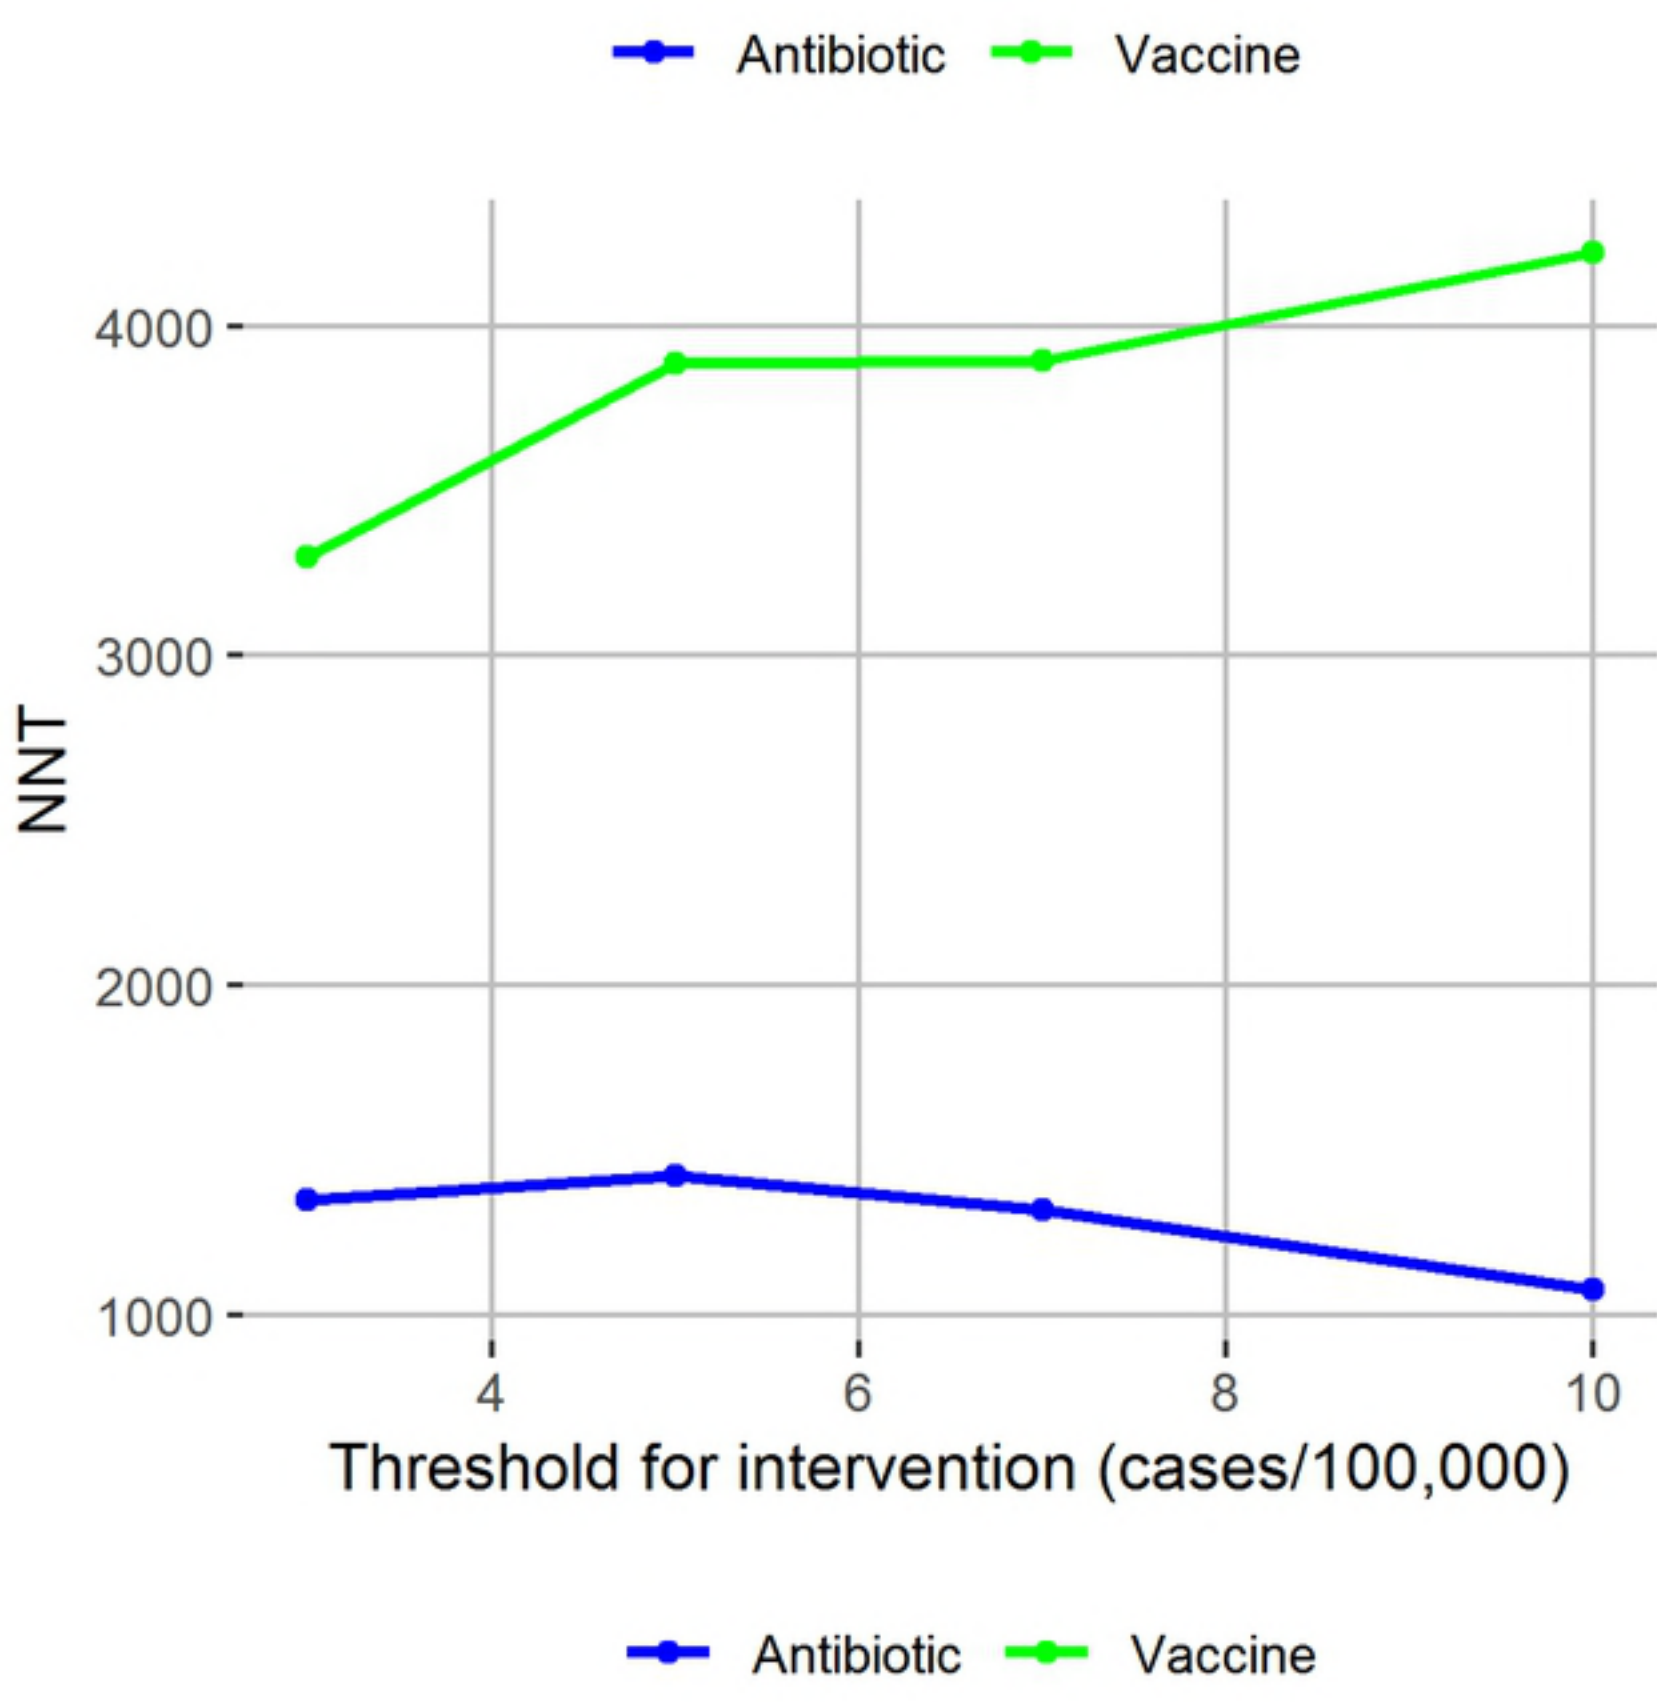

Figure

Pre-epidemic

- Surveillance unit
- ▽ Village
- Triggering case
- ⚭ Contact

Area of study

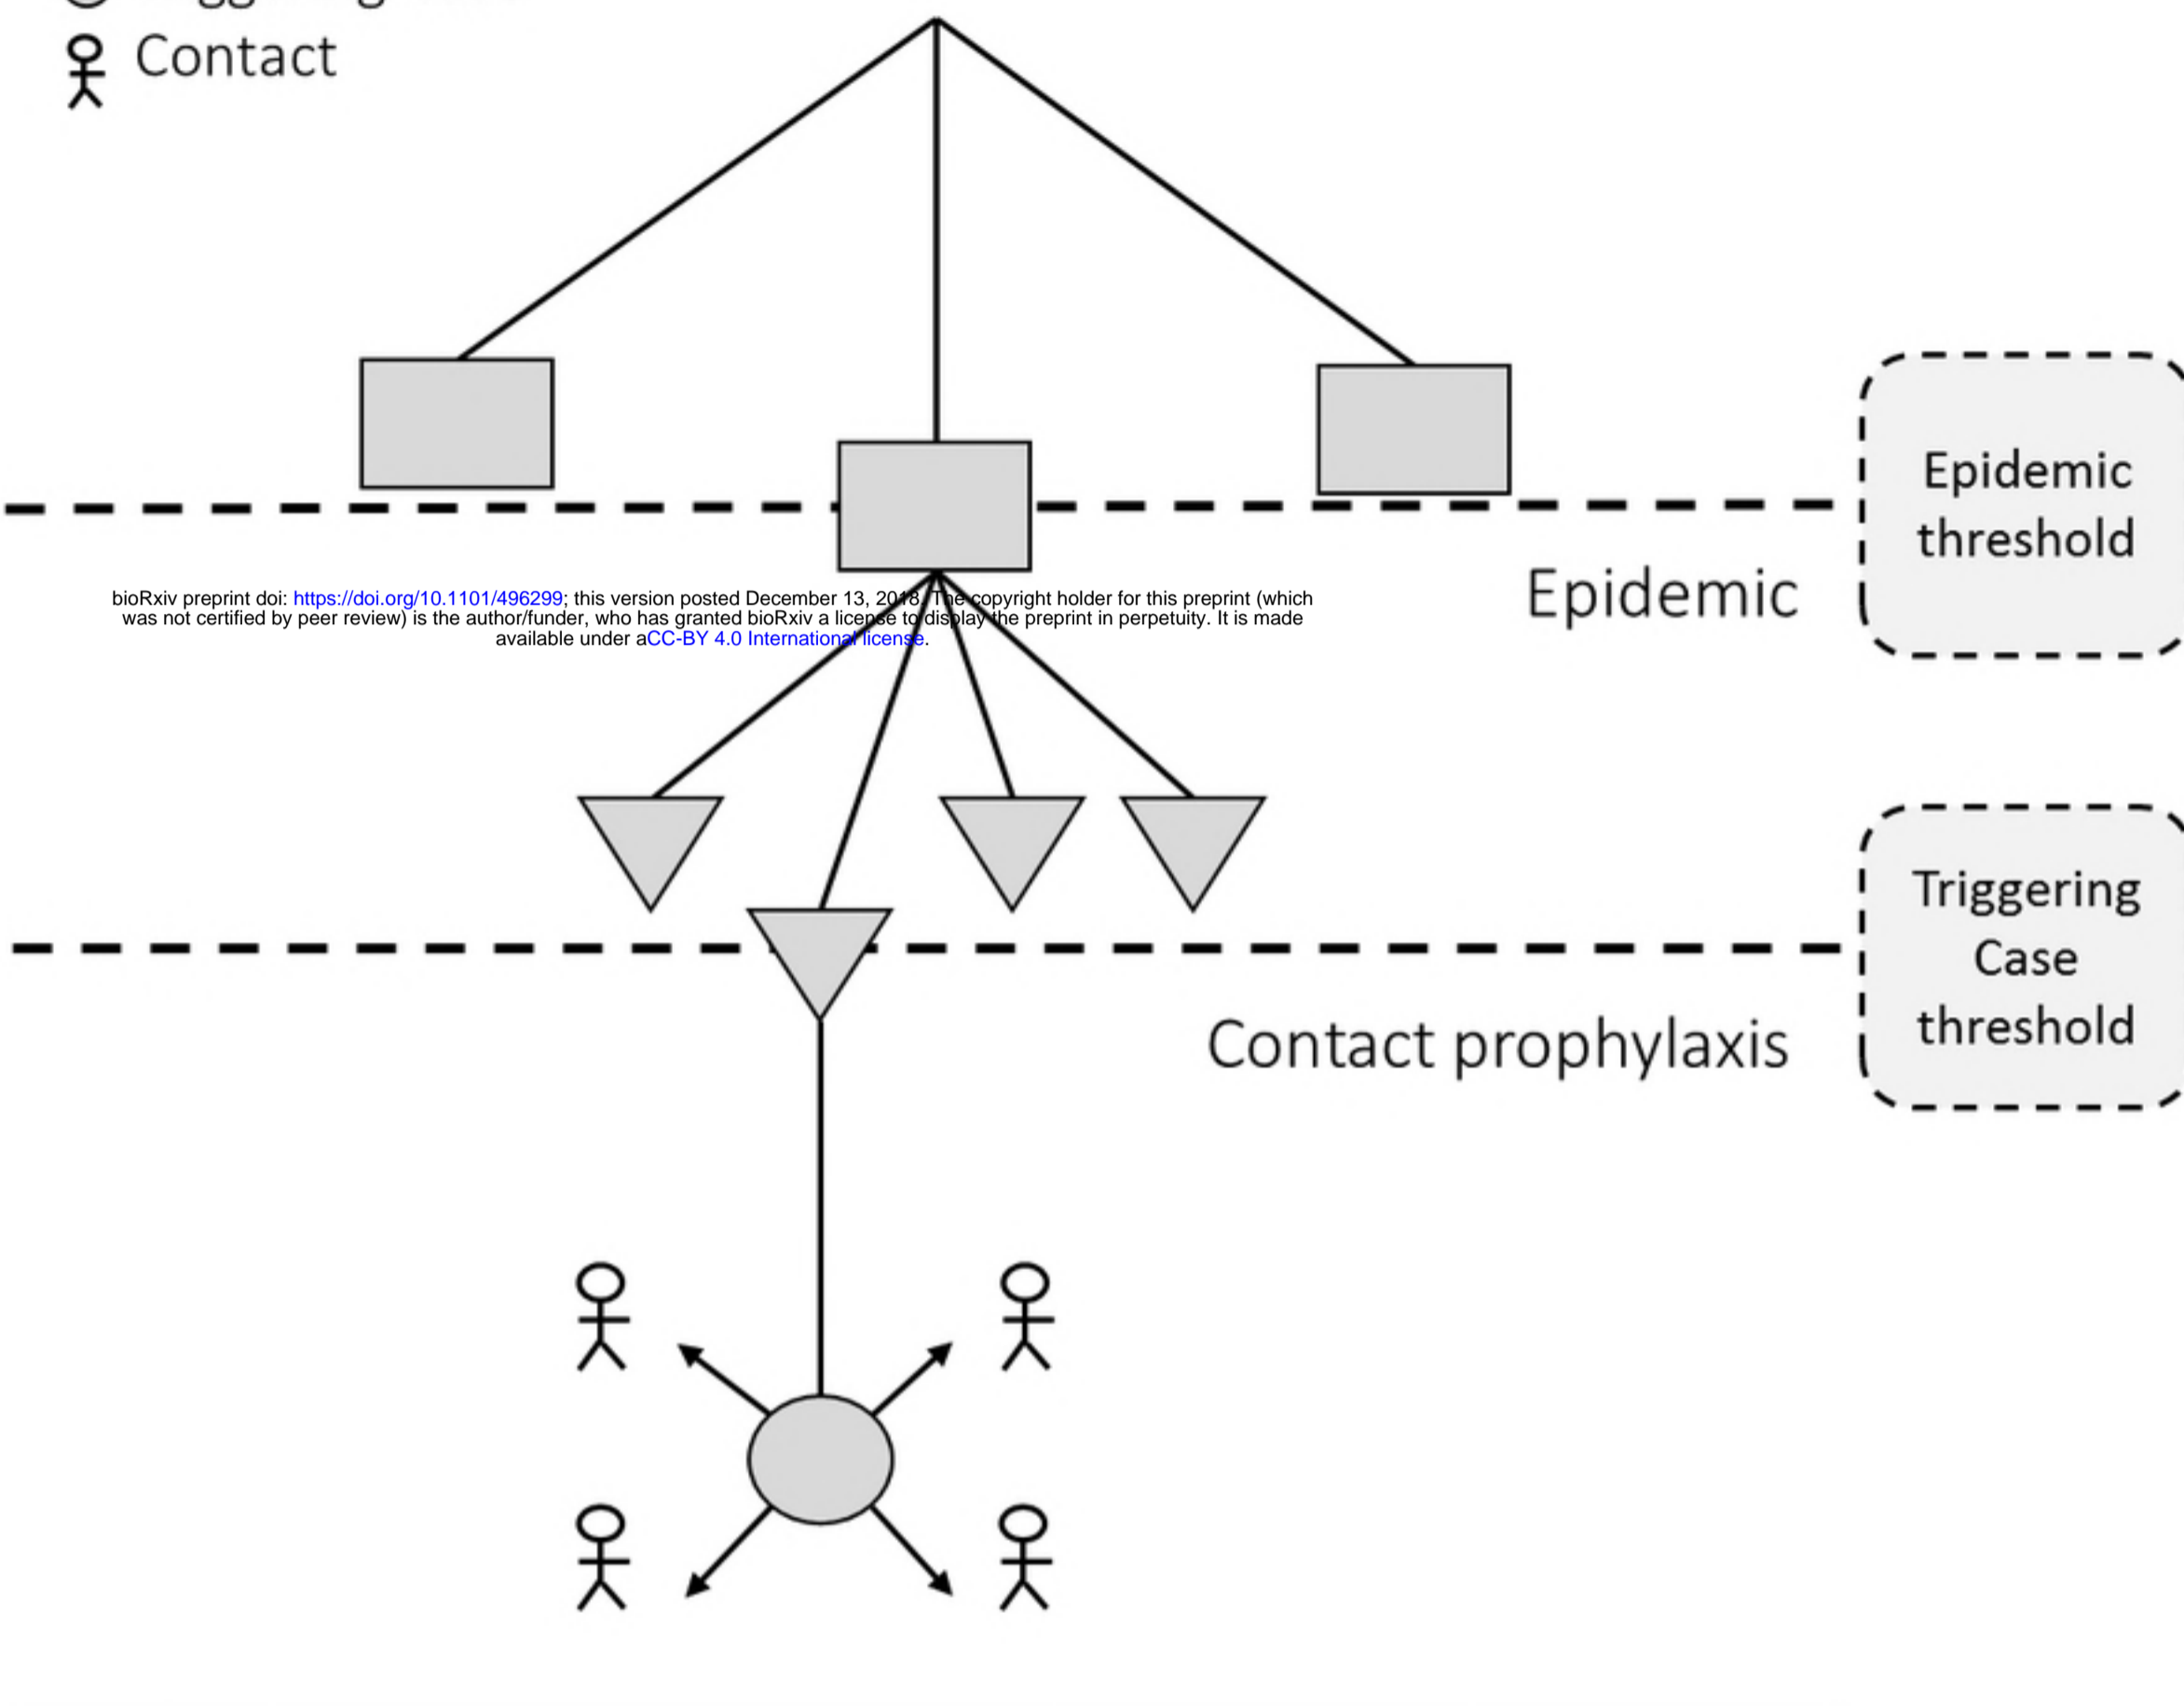

bioRxiv preprint doi: <https://doi.org/10.1101/496299>; this version posted December 13, 2018. The copyright holder for this preprint (which was not certified by peer review) is the author/funder, who has granted bioRxiv a license to display the preprint in perpetuity. It is made available under aCC-BY 4.0 International license.

| Stage of intervention | Scope                                                               | Actions taken                                                     |
|-----------------------|---------------------------------------------------------------------|-------------------------------------------------------------------|
| Pre-epidemic          | At the level of the surveillance unit, across the area of study     | Monitor weekly case count/attack rate to declare an epidemic      |
| Epidemic              | At the village level, across all villages within an epidemic region | Monitor cases at the village level to identify triggering cases   |
| Contact prophylaxis   | At the individual level, within a village with a triggering case    | Identify contacts of a triggering case and distribute prophylaxis |

Figure
